1 **Insm1 regulates the development of mTECs and immune tolerance**

2 Wehuai Tao<sup>1,2,3</sup>, Yiqiu Wei<sup>1,2,3</sup>, Zhihuan Ye<sup>1,2,3</sup>, Jianxue Wang<sup>1</sup>, Weixin Yang<sup>1</sup>,

3 Guoxing Yu<sup>1,2,3</sup>, Jieyi Xiong<sup>\*4,5</sup>, Shiqi Jia<sup>\*1,2,3</sup>

4

5 1 The First Affiliated Hospital of Jinan University, Guangzhou, China

6 2 The Guangdong-Hong Kong-Macao Joint University Laboratory of Metabolic

7 and Molecular Medicine, Jinan University, Guangzhou, China

8 3 The Institute of Clinical Medicine, Jinan University, Guangzhou, China

9 4 Max Delbrück Center for Molecular Medicine in the Helmholtz Association,  
10 Berlin, Germany

11 5 VIB-KU Leuven Center for Cancer Biology, Leuven, Belgium

12

13

14

15

16 #These authors contribute equally to this work

17

18

19 \* Corresponding author:

20 Shiqi Jia, Phone: +86-20-3868 0563, Email: [shiqijia@jnu.edu.cn](mailto:shiqijia@jnu.edu.cn)

21 ORCID for Shiqi Jia: 0000-0001-8595-9314

22 Jieyi Xiong, Phone: +32 478 11 49 46, Email: [jieyi.xiong@kuleuven.be](mailto:jieyi.xiong@kuleuven.be)

23 ORCID for Jieyi Xiong: 0000-0002-4302-3515

24

25

26

27

28 **Abstract**

29 The *Insm1* gene encodes a zinc finger protein with known functions in  
30 neuroendocrine cells and neurons. Here we characterized the expression and  
31 function of *Insm1* in medullary thymic epithelial cells (mTECs). *Insm1* is co-  
32 expressed with Aire in majority of *Insm1* or Aire positive cells, while a few  
33 *Insm1* positive cells did not express Aire. Mutation of *Insm1* impair the  
34 expression of *Aire* and the generation of normal numbers of Aire-expressing  
35 mTECs during development. We detected downregulation of genes that  
36 expressed specifically in Aire-expressing mTEC and mimetic cells in *Insm1*  
37 mutant mTECs. Conversely, when *Insm1* was overexpressed in thymic  
38 epithelial cells *in vivo*, the size of the mTECs compartment was enlarged and  
39 the expression of *Aire* and genes expressed specifically in the neuroendocrine  
40 mimetic cells were increased. Mechanistically, *Insm1* bound DNA in mTECs  
41 and the majority of the *Insm1* binding sites were co-occupied by Aire. These  
42 *Insm1* binding sites were enriched on super-enhancer regions and thus may  
43 contributed to remoted regulation. Both, mice with a thymus-specific mutation  
44 in *Insm1* or nude mice transplanted with *Insm1* mutant thymus, displayed  
45 autoimmune responses in multiple peripheral tissues. Together, our data  
46 demonstrate a role of *Insm1* in development of mTECs and immune tolerance.

47

48 **Key words**

49 medullary thymic epithelial cells (mTEC), mimetic cells, tissue-restricted  
50 antigens (TRAs), Insulinoma-associated protein 1 (*Insm1*), autoimmunity, The  
51 autoimmune regulator (*Aire*)

52

## 53 **Introduction**

54       The thymus is a primary lymphoid organ where T cell progenitors undergo  
55 maturation and selection to become functional T cells. The medullary thymic  
56 epithelial cells (mTECs) control negative selection which eliminates self-  
57 antigen-recognizing T cells, and promote differentiation of regulatory T cells  
58 (Treg cells, CD4<sup>+</sup>Foxp3<sup>+</sup>CD25<sup>+</sup>) (1, 2). In contrast, the cortical thymic  
59 epithelial cells (cTECs) control T cell lineage commitment and positive  
60 selection. Ectopic expression of thousands of peripheral tissue-restricted  
61 antigens (TRAs) in mTECs, also called promiscuous gene expression, is  
62 believed to be a key for negative selection and the establishment of self-  
63 tolerance (3). The autoimmune regulator (Aire) is identified as the essential  
64 transcription factor that directly regulate TRAs expression and autoimmunity  
65 (4, 5). In the last two decades, studies have focused on the Aire-expressing  
66 cells and provided key molecular insights into how the TRAs expression is  
67 regulated by Aire (6-12). Particularly, Aire was identified as a chromatin  
68 looping regulator in mTECs, where Aire binds to super-enhancers and  
69 promotes the interaction between enhancers and the TRA genes (13). Studies  
70 on Aire also revealed that correct TRAs expression in the perinatal but not  
71 adult stage is essential for the establishment of self-resistance (14-16). The  
72 behind mechanism is not totally clear (17). However, studies have defined  
73 differences in the cell number of the thymic cell subpopulations during  
74 postnatal development, for instance, the perinatal cTECs (TEC progenitors)  
75 are enriched in perinatal stage and dramatically decreased with aging (17);  
76 Aire-expressing mTECs are not separated well with post-Aire mTECs in the  
77 perinatal stage, and the muscle mTECs are more enriched in perinatal than in

78 adult stages (18). These cellular differences may have functional implications  
79 for setting tolerization during early life.

80 Recently, studies using single-cell RNA sequencing (scRNA-seq)  
81 identified highly differentiated mTEC subsets that bore striking similarity of  
82 molecular characteristics of the peripheral cells (19-22). These mTEC subsets  
83 are further extended by identifying the peripheral cell lineage-defining  
84 transcription factors that are required for the accumulation of these mTECs  
85 (18). The highly differentiated mTECs are named mimetic cells, which at least  
86 include FoxA-positive neuroendocrine cells, Hnf4a-positive enterohepatic cells,  
87 Sox8/SpiB-positive microfold cells, Pou2f3-positive Tuft cells, FoxJ-positive  
88 ciliated cells, Grhl-positive keratinocytes and Myog-positive muscle cells (18,  
89 23). The cellular and molecular bases of the central tolerance is thus  
90 established by TRAs expression in the Aire-expressing mTECs as well as  
91 mimetic cells under the control of additional transcription factors (23).

92 The mimetic cells are among the population of post-Aire mTECs (18),  
93 which is developed and differentiated from Aire-expressing mTECs (24).  
94 Therefore, nearly all mimetic cells had previously expressed Aire and thus  
95 downstream of Aire expression (18). In addition, many TRAs expressed in  
96 mimetic cells are Aire-induced genes (18). However, the differentiation of tuft  
97 cells does not depend on Aire (19)

98 Herzig *et al.* screened potential regulators of Aire-expression, and  
99 identified Insulinoma-associated protein 1 (Insm1) as a transcription factor  
100 expressed in mature mTECs and a candidate regulator of Aire. However, no  
101 functional analysis of Insm1 was performed in mTECs (25). We present here  
102 a genetic and molecular analysis of Insm1 in the thymus, and show that

103 *Insm1* is a novel regulator in both Aire-expressing mTECs and  
104 neuroendocrine mimetic cells.

105

## 106 **Results**

### 107 ***Insm1* is expressed in Aire-expressing mTECs and neuroendocrine** 108 **mimetic cells**

109 To investigate the expression of *Insm1* in the thymus, we performed  
110 immunofluorescence analysis. For this we used *Insm1*<sup>+/*lacZ*</sup> and *Insm1*<sup>*lacZ*/*lacZ*</sup>  
111 mice in which one or two alleles of *Insm1* codon sequence were replaced by  
112 *lacZ* that encodes beta-galactosidase ( $\beta$ -gal) (26, 27). Therefore, the  
113 expression of *Insm1* can be monitored using  $\beta$ -gal. We compared signals  
114 obtained using antibodies against  $\beta$ -gal and *Insm1*, and observed that  $\beta$ -gal  
115 was expressed in the medulla of the thymus in both *Insm1*<sup>+/*lacZ*</sup> and  
116 *Insm1*<sup>*lacZ*/*lacZ*</sup> mice (Fig. S1A). *Insm1* immunoreactivity overlapped with  $\beta$ -gal in  
117 the thymus of *Insm1*<sup>+/*lacZ*</sup> but was absent in *Insm1*<sup>*lacZ*/*lacZ*</sup> mice (Fig. 1A and  
118 Fig.S1A). Thus, the *Insm1* antibody specific detected the endogenous *Insm1*  
119 expression. Unlike the exclusive nuclear location in neuroendocrine cells (28,  
120 29), *Insm1* protein was detected in both, the nuclei and the cytoplasm of  
121 thymic cells (Fig 1B).

122 The thymic epithelial compartment is formed by cTECs and mTECs, and  
123 contains also lymphocytes and dendritic cells (30). To define the cell-type that  
124 expresses *Insm1*, we performed immunofluorescence using antibodies  
125 against *Insm1* and cell type specific markers in both, the fetal (E18.5) and  
126 adult thymus. We did not observe co-expression of *Insm1* with the lymphocyte  
127 specific marker CD45, or the dendritic cell marker Cd11b and Cd11c in

128 thymuses of E18.5 and 6-week old mice (Fig. S1B,C). However, *Insm1* was  
129 co-expressed with the mTECs marker keratin 5 (*Krt5*) but not the cTECs  
130 marker keratin 8 (*Krt8*) (Fig. 1C,D). Using *Insm1*/Aire double antibodies  
131 staining, we further observed that 70% of the *Insm1*-positive cells co-  
132 expressed Aire and vice versa (Fig. 1E). The overlapping expression pattern  
133 of *Insm1* and Aire was also observed in thymuses of adult mice (Fig S1D).  
134 Moreover, the Aire-dependent TRAs insulin and somatostatin were co-  
135 expressing with *Insm1* in the thymus of adults (Fig S1E and S2A). To  
136 investigate the expression of *Insm1* in post-Aire populations, we used the  
137 published single cell RNA-seq data, which were generated from the isolated  
138 post-Aire mTECs using the two makers that specifically downregulated in  
139 post-Aire mTECs, podoplanin (*Pdpn*) and integrin  $\beta 4$  (*CD104*), i.e., the *Pdpn*<sup>-</sup>  
140 *CD104*<sup>-</sup> cells separated from *CD45*<sup>-</sup>*EpCAM*<sup>+</sup>*MHCII*<sup>lo</sup>*Ly51*<sup>-</sup> mTECs (18). The  
141 scRNA-seq data showed that the isolated cells contained mostly the post-Aire  
142 mTECs, but also cells that are not fully separated from post-Aire mTECs  
143 which include immature mTECs, transit-amplifying mTECs (the direct  
144 progenitor of Aire-expressing mTECs), Aire-expressing mTECs, and cTECs  
145 (18) (Fig S2B). We found that *Insm1* was expressed in neuroendocrine cells  
146 in the post-Aire mimetic cells in both perinatal and adult stages (Fig 1F and  
147 Fig S2B-D), while Aire expressing was not appeared in the mimetic cells (Fig  
148 1G and Fig S2B-D). We further verified the co-expressing of *Insm1* with  
149 neuroendocrine mimetic cell markers *Foxa2* and chromogranin A in adult  
150 thymus (Fig 2A,B). In summary, *Insm1* is expressed in Aire-expressing  
151 mTECs and post-Aire neuroendocrine mimetic cells.

## 152 **Tissue morphology and cell populations in *Insm1* mutant thymus**

153        There was no difference in the appearance of size and shapes of thymus  
154        at E18.5 in mutants (Fig S2D). The distribution and relative amounts of  
155        mTECs and cTECs identified by Krt5 and Krt8, respectively, were comparable  
156        between wildtype and *Insm1* mutant mice (Fig S2E,F). We used flow  
157        cytometry to further investigated cell populations of mTECs. The number of  
158        EpCAM labeled thymic epithelial cells (CD45<sup>-</sup>EpCAM<sup>+</sup>) and UEA1 labeled  
159        mTECs (CD45<sup>-</sup>EpCAM<sup>+</sup>UEA1<sup>+</sup>) were comparable in wildtype controls and  
160        *Insm1* mutants both at E18.5 and adults (Fig.2C,D). However, the proportions  
161        of Aire-positive cells were significantly decreased in mTECs (CD45<sup>-</sup>  
162        EpCAM<sup>+</sup>Ly51<sup>-</sup>) of *Insm1* mutants at E18.5 but not altered in adult animals  
163        (Fig.2E). Thus, the *Insm1* mutation affected the development of Aire-positive  
164        mTECs.

165        Using qRT-PCR, we examined the expression of genes that were identified to  
166        be specifically expressed in each of the mimetic cells (18) (Fig 2F upper  
167        panel). We found that genes specifically expressed in neuroendocrine,  
168        enterohepatic and Ptf1a<sup>+</sup>pancreatic cells were downregulated in *Insm1* mutant  
169        adult mice (Fig 2F lower panel). The data indicated that the mimetic cells, i.e.,  
170        neuroendocrine, enterohepatic and Ptf1a<sup>+</sup>pancreatic mimetic cells, were  
171        affected by the *Insm1* mutation.

### 172        **Decreased expression of *Aire* and mTEC genes in *Insm1* mutants**

173        As we observed a decreased number of Aire-positive cells in the  
174        developing *Insm1* mutant thymus, we investigated the expression levels of  
175        Aire. The immunofluorescence intensity which indicated the Aire protein level  
176        was moderately but significantly decreased in mTECs of *Insm1* mutant mice  
177        at E18.5 (Fig.3A). Using real-time quantitative reverse transcription PCR

178 (qRT-PCR), we detected decreased transcript levels of *Aire* in mTECs in both,  
179 *Insm1* mutant E18.5 mice and adult mice with thymic specific mutation in  
180 *Insm1* (*Foxn1Cre;Insm1<sup>flox/flox</sup>*, subsequently called *Thy-cKO*) (Fig. 3B,C).  
181 Thus, the *Insm1* mutation resulted in decreased expression of *Aire*.

182 To analyze the global gene expression changes in *Insm1* mutant thymus,  
183 we performed RNA-seq using mTECs isolated from both *Insm1* mutant E18.5  
184 and *thy-cKO* adult mice. To our surprise, differential gene expression test by  
185 DESeq2 under cutoff of  $FDR \leq 0.1$  and fold change  $\geq 1.5$ , identified 63 and 97  
186 dysregulated genes in E18.5 and adult mice, respectively (Fig 3D,E and Table  
187 S1,S2). The numbers of the dysregulated genes were far less than that of  
188 *Aire*-regulated genes reported in a previous study (31). Nevertheless, *Aire*  
189 expression was detected downregulated in both E18.5 and adults in the RNA-  
190 seq data (Fig 3D,E), which was consistent with the observation in qRT-PCR  
191 and immunofluorescence analysis (Fig 3A-C). To characterize the *Insm1*  
192 effects on different mimetic cell types, we analyzed the expression pattern of  
193 the *Insm1*-dependent genes in the published scRNA-seq data that were  
194 generated from post-*Aire* mTECs (18). The downregulated genes enriched in  
195 several types of mimetic cells as well as in the unseparated *Aire*-expressing  
196 mTECs both in E18.5 (Fig 3F left) and in adult (Fig 3F right). Thus, although  
197 moderate numbers of the dysregulated genes were identified in *Insm1*  
198 mutants, *Insm1* regulates the gene expression in *Aire*-expressing mTECs and  
199 mimetic cells.

200 Considering that each of the TRAs is typically expressed in only 1-5% of  
201 mTECs (32), we used a loose cutoff ( $p$ -value  $\leq 0.05$  and fold change  $\geq 1.5$ ) to  
202 define trends of TRAs expression (Fig 3D,E), which distinguished 78 and 81



203 downregulated TRA genes in the mTECs of E18.5 and adult animals,  
204 respectively (Fig S3A, Fig 3G and Table S3,S4). Using Qrt-PCR, we verified  
205 the altered expression of a subset of these dysregulated genes (Fig 3B,C).  
206 We compared the downregulated genes observed in *Insm1* mutant mTECs  
207 with the ones identified in *Aire* mutant mTECs (31). Among the dysregulated  
208 TRA genes, we found both, Aire-dependent and -independent TRAs, to be  
209 downregulated (Fig 3G and Fig S3A). Among the 81 downregulated TRA  
210 genes in adults, twenty-six was downregulated in both, *Aire* and *Insm1*  
211 mutants. However, fifty-five (68%) of the TRA genes were unique to *Insm1*  
212 mutant mTECs (Fig.3G). Thus, *Insm1* regulates the expression of TRA genes  
213 in mTECs, and effects both, Aire-dependent and -independent TRAs.

214 Using the published scRNA-seq data (18), we assigned the  
215 downregulated TRAs to the mimetic cell types. Among the mimetic cell types,  
216 *Insm1* expression is restricted in neuroendocrine cells (Fig 1F). However, the  
217 downregulated TRAs were not restricted to neuroendocrine mimetic cells.  
218 Instead, these TRAs was found in multiple mimetic cell types, i.e., the  
219 enterohepatic and microfold cells, in both E18.5 and adult animals (Fig 3H).  
220 We investigated the tissue types where TRA genes are dominantly expressed  
221 using public microarray data (33). We noticed that *Insm1*-dependent TRAs  
222 were expressed in all the tested peripheral tissues and with relative higher  
223 frequency in the gastrointestinal tract and neuroendocrine tissues (Fig.S3B).

#### 224 ***Insm1* promotes *Aire* and TRA expression**

225 We induced over-/ectopic-expression of *Insm1* (*Insm1OE*) *in vivo* using  
226 genetic tools (Fig S4), i.e., a mouse line that harbors a *loxp-STOP-loxp-Insm1*  
227 cassette in the *Rosa26* locus, and the *Foxn1Cre* transgenic allele that allows

228 thymus specific expression. We observed increased numbers of *Insm1*-  
229 positive cells and enlarged *Krt5*-positive mTECs areas in the *Insm1OE*  
230 thymus (Fig 4A). Moreover, the *Aire*-positive cells were increased in the  
231 thymic sections, although the increase of such cells was less obvious as the  
232 one of *Insm1*-positive cells (Fig 4A). Increased expression levels of *Aire* were  
233 detected by qRT-PCR using RNA isolated from the whole thymus or from  
234 mTECs (Fig 4B,C). Interestingly, four of the nine TRA genes that were  
235 downregulated in *Insm1* mutant thymuses showed significantly increased  
236 expression upon *Insm1* overexpression (Fig 4B,C). We investigated the  
237 expression of mimetic cell marker genes that was downregulated in *Insm1*  
238 mutant mTEC. *Insm1* overexpressing promoted the neuroendocrine cells  
239 specific marker genes expression (Fig 4B,C). Thus, *Insm1* promoted mTECs  
240 fate and the expression mTEC specific genes such as *Aire*, TRAs and  
241 neuroendocrine-specific markers.

#### 242 ***Insm1* binds on promoters and super-enhancers in mTECs**

243 *Insm1* was identified as a transcriptional factor in endocrine cells (28). To  
244 investigate the mechanism of *Insm1* function, we examined the genome wide  
245 DNA-binding of *Insm1* using CUT & Tag analysis. We detected 5,206 *Insm1*  
246 binding peaks (union of 3 repeats,  $q < 1e-5$ ) in mTEC of E18.5 and 1,458  
247 (union of 2 repeats,  $q < 1e-5$ ) peaks in mTEC of adults (Fig 5A,B). Although a  
248 less numbers of *Insm1* binding peaks were identified in adults, 1,382 (94.7%)  
249 peaks identified in adult mTEC were overlapped with the peaks detected in  
250 E18.5 mTEC, indicating a significant amount of consensus *Insm1* binding on  
251 DNA in mTEC during development.

252 Although the majority of *Insm1* binding sites were located on promoter  
253 regions in both E18.5 (50%) and adults (65.8%) (Fig 5A,B), only two (Fig 5C,  
254 E18.5) and three (Fig 5D, adult) of these *Insm1* bound genes were  
255 dysregulated in *Insm1* mutation (Fig 5C,D). Furthermore, we found the  
256 dysregulated genes, which were identified by a looser cutoff ( $p$ -value<0.05,  
257 FC>1.5) in the RNA-seq data, were not enriched but depleted for *Insm1*  
258 binding on the promoter (Fisher test,  $p$ <0.0001) (Fig 5E). These evidences  
259 suggest that *Insm1* binds on promoters but did not significantly contribute to  
260 the correlated gene expression.

261 *Insm1* is co-expressed with Aire in mTECs (Fig1E, Fig S1D), we  
262 therefore compared the DNA binding of *Insm1* with that of Aire identified in  
263 published data sets (31, 34). The majority of *Insm1* binding sites (72-78%)  
264 were co-occupied by Aire (Fig S5A,B). Since Aire was reported binding on  
265 super-enhancers and performing regulatory roles in mTEC (13), we  
266 investigated the *Insm1* binding sites and found significantly enriched binding  
267 of *Insm1* on super-enhancers (Fig.5F-H). We further found that the  
268 dysregulated genes were significantly over-represented within 500kb of the  
269 *Insm1*-binding super-enhancers at E18.5 mTECs (Fig. 5I). These results imply  
270 that *Insm1* could bind on super-enhancers and participate in the gene  
271 expression regulation in the developing mTECs.

## 272 **Autoimmune responses in nude mice transplanted with *Insm1* mutant** 273 **thymuses**

274 We used thymus transplantation in nude mice to study autoimmune reactions.  
275 For this, T cells depleted thymuses that were isolated from fetal control  
276 (*Insm1*<sup>+/lacZ</sup>) and mutant (*Insm1*<sup>lacZ/lacZ</sup>) mice were transplanted into the renal

277 capsule of six-week old nude mice (35) (Fig.6A,B). Eight weeks after  
278 transplantation, the size and structure of the transplanted thymuses were  
279 similar regardless whether they derived from control or *Insm1* mutant animals  
280 (Fig.6C and Fig.S6). Further, the numbers of CD4+ and CD8+ cells detected  
281 by flow cytometry were comparable in the transplanted control and mutant  
282 thymuses (Fig.6D). However, the spleens of nude mice transplanted with a  
283 mutant thymus (*KO/nu* mice) were increased in size and weight compared to  
284 the one of animals that received a control transplant (*Het/nu* mice) (Fig. 6E).  
285 Furthermore, the structure of the spleen was altered (Fig 6F), but the lymph  
286 nodes were unchanged (Fig S6). In particular, spleen follicles of *KO/nu* mice  
287 were smaller than that those of *Het/nu* mice (Fig. 6F). We investigated  
288 lymphocyte infiltration of various organs using hematoxylin eosin (H&E)  
289 staining, that detects the accumulation of lymphocyte nuclei. Increased  
290 infiltration was observed in pancreatic islets, lungs, kidneys and salivary  
291 glands of *KO/nu* mice (Fig.6G,H), but not in other investigated tissues (Fig.S6).

292 Next, we analyzed autoimmune reactions by the detection of autoimmune  
293 antibodies. Among the 13 investigated tissues, we observed autoimmune  
294 antibody reactions in pancreatic islets, kidney, and testis by staining these  
295 tissues with the serum obtained from the *KO/nu* mice (Fig 6I and Fig S7). In  
296 particular, serum of *KO/nu* mice detected subsets of pancreatic polypeptide  
297 (Pp) positive cells, glucagon (Gcg) positive alpha cells, and somatostatin (Sst)  
298 positive delta cells, whereas insulin (Ins) positive beta cells were rarely  
299 detected (Fig 6J). Thus, autoimmune antibody against PP-, alpha- and delta-  
300 cells were present in *KO/nu* mice. To sum up, the transplantation of *Insm1*

301 mutant thymuses into nude mice results in autoimmune responses in multiple  
302 tissues.

### 303 **Thymus specific *Insm1* mutant mice show autoimmune responses**

304 We employed thymus-specific *Insm1* mutant mice, *Foxn1Cre;Insm1<sup>flox/flox</sup>*  
305 (*Thy-cKO*), and littermates *Foxn1Cre* or *Insm1<sup>flox/flox</sup>* controls to further  
306 examine the autoimmune phenotype. The *Thy-cKO* mice were born healthy  
307 and displayed no obvious abnormalities in adulthood. We observed  
308 decreased expression levels of *Insm1*, *Aire* and the Aire-dependent and -  
309 independent TRAs in mTECs of *Thy-cKO* mice (Fig 3C), which is similarly to  
310 the changes observed in *Insm1* null mutant mTECs (Fig 3B). CD4<sup>+</sup> and CD8<sup>+</sup>  
311 T cells was properly generated in the thymus (Fig 7A) and developed in lymph  
312 nodes (Fig 7B) of *Thy-cKO* mice, as analyzed by flow cytometry. However, we  
313 detected significantly decreased numbers of Treg cells (CD8<sup>-</sup>  
314 CD4<sup>+</sup>Foxp3<sup>+</sup>CD25<sup>+</sup>) in the thymus of *Thy-cKO* mice (Fig 7C), and we  
315 observed a trend towards a reduced number of Treg cells in lymph nodes that  
316 did not reach statistical significance (Fig 7D).

317 We investigated the infiltration of lymphocytes into various tissues at 6-  
318 week, 6-, 12- and 18-month-old *Thy-cKO* animals. Generally, we observed  
319 pronounced lymphocyte infiltration in multiple organs that increased in  
320 frequency with the age of the animals. Infiltrated lymphocytes were observed  
321 in salivary glands of 6-week-old and in multiple organs of 1.5-year-old *Thy-*  
322 *cKO* mice, the infiltrated organs including the pancreas, the salivary gland, the  
323 liver, the lung and the brown fat (Table 1 and Fig 7E). Further, we detected  
324 autoimmune antibodies against multiple tissues including the pancreas, the  
325 salivary gland and the ovary when serum of *Thy-cKO* mice was used for

326 immunostaining (Table 2 and Fig 7F). Thus, mutation of *Insm1* in the thymus  
327 resulted in autoimmune responses in multiple periphery organs in a subset of  
328 the *thy-cKO* mice.

329

### 330 **Discussion:**

331 *Insm1* was previously described as a factor functioning in neuroendocrine  
332 cells and neurons (27-29, 36-38). Herzig, Y *et al* reported the first evidence  
333 indicating *Insm1* is a candidate transcriptional regulator of *Aire* (25). However,  
334 to our knowledge functional data on a role of *Insm1* in thymus have not been  
335 systematic analyzed. We used *Insm1* null mutant mice, thymus-specific *Insm1*  
336 mutants and transplanted the thymus of *Insm1* mutants for an analysis of a  
337 role of *Insm1* in autoimmunity.

338 We detected that *Insm1* is expressed in mTECs. Majority of *Insm1* is  
339 expressed in *Aire* positive cells while a minor population of *Insm1* positive  
340 cells did not express *Aire*. Using the published scRNA-seq data that were  
341 generated from post-*Aire* mTECs (18), we found that *Insm1* is expressed in  
342 post-*Aire* neuroendocrine mimetic cells. In *Insm1* mutant mTECs, the  
343 expression of *Aire*, the *Aire*-dependent and -independent TRAs were  
344 decreased. In consistent with the gene expression, *Insm1* mutation results in  
345 less *Aire*-positive cells in developmental mTECs but not the adult mTEC.  
346 Considering the cellular difference between perinatal and adult, i.e., *Aire*-  
347 expressing mTEC are enriched in post-*Aire* mTECs at the perinatal stage (18),  
348 *Insm1* may contribution to the development of fetal *Aire*-expressing mTEC  
349 and the establishment of tolerization. To identify the regulatory role of *Insm1*  
350 in mimetic cells, we examined the mimetic cell-type-specific gene expression

351 and found that only those genes expressed in the neuroendocrine,  
352 enterohepatic, and pancreatic cells was downregulated in *Insm1* mutation. As  
353 *Insm1* is co-expressed with *Aire* and consistently expressed only in post-*Aire*  
354 neuroendocrine mimetic cells, the alteration of gene expression in  
355 enterohepatic and *Ptf1a*<sup>+</sup>pancreatic cells may reflect the developmental  
356 regulation of *Insm1* during the differentiation process of *Aire*-expressing  
357 mTECs into enterohepatic and *Ptf1a*<sup>+</sup>pancreatic cells. When *Insm1*  
358 overexpression was induced in the thymus, enlarged areas of *Krt5* expression  
359 were observed, and the expression levels of *Aire* and *TRA* genes were  
360 increased. Furthermore, neuroendocrine cell marker genes were induced. The  
361 data further confirm the regulatory role of *Insm1* in development of *Aire*-  
362 expressing mTEC and the post-*Aire* neuroendocrine mimetic cells.

363       The molecular and cellular model of *TRA* expression showed that *Aire*-  
364 expressing mTEC further differentiated into mimetic cells and both of *Aire*-  
365 expressing mTECs and mimetic cells are essential for the establishment of  
366 self-tolerance (23). In our study, we showed that *Insm1* is expressed in *Aire*-  
367 expressing mTECs and neuroendocrine mimetic cells, indicating that *Insm1* is  
368 expressed in serial developmental stages of mTECs, i.e., widely expressed in  
369 *Aire*-expressing mTECs and restricted in neuroendocrine mimetic cells.  
370 Mutation of *Insm1* impaired the gene expression in both *Aire*-expressing  
371 mTEC and neuroendocrine cells. The deficits of gene expression in *Aire*-  
372 expressing mTECs may contribute to the alteration of the gene expression in  
373 mimetic cells, such as the enterohepatic cells and *Ptf1a*<sup>+</sup> pancreatic cells.  
374 Thus, *Insm1* contributes to the development and function of *Aire*-expressing  
375 mTECs and post-*Aire* neuroendocrine mimetic cells.

376 Interestingly, we observed that *Insm1* binding on the super-enhancer  
377 regions in mTECs. These super-enhancers contribute to the expression of  
378 *Insm1*-dependent genes. In addition, the majority of *Insm1* binding sites  
379 overlapped with those of *Aire*, pointing towards the functional importance of  
380 the set of cis-elements binding by both, *Insm1* and *Aire* in mTEC. Although a  
381 high proportion of common *Insm1* binding sites were observed in mTECs of  
382 E18.5 and adult mice, the dysregulated genes were not conserved between  
383 E18.5 and adult in *Insm1* mutants. Rather, more up-regulated genes were  
384 identified in *Insm1* mutant adult mTECs than that of E18.5. In addition, the  
385 *Insm1*-binding super-enhancers were significantly correlated with the *Insm1*-  
386 dependent genes expressed at E18.5 but not at adult stages, one explanation  
387 is that *Aire*-expressing mTEC is more enriched in post-*Aire* mTECs in  
388 perinatal than adult stage, *Insm1* may regulate gene expression mainly in  
389 *Aire*-expressing mTECs through binding of super-enhancers. As *Insm1* is also  
390 expressed in neuroendocrine mTECs, further analysis of *Insm1* function in the  
391 individual sub-population is needed, particularly in neuroendocrine mimetic  
392 cells.

393 Mutation of *Insm1* results in about 50% decrease of *Aire* expression. A  
394 dosage effect of *Aire* in TRAs regulation was discussed controversially. *Herzig*  
395 et al showed that 50% decreased *Aire* expression in *Aire*<sup>+/-</sup> mice did not alter  
396 the *Aire*-dependent TRAs expression (25). In contrast, others demonstrated  
397 an 80-90% reduction in the expression of a particular TRAs (*Ins2*, *Tff3*, *Mup1*  
398 and *Spt1*) in *Aire*<sup>+/-</sup> compared to wild-type littermate control mice (39).  
399 Additional studies also showed that TRAs levels were regulated by dosage of  
400 *Aire* expression (40, 41). In the *Insm1* mutant thymus, we observed



401 downregulated expression of Aire-dependent TRA genes, possibly due to the  
402 decreased Aire expression.

403 In nude mice transplanted with *Insm1* mutant thymuses or in thymus  
404 specific *Insm1* mutant mice, we observed lymphocyte infiltration and  
405 autoimmune antibodies. These autoimmune responses were directed against  
406 various tissues, among them are pancreatic islets, the salivary gland, the lung  
407 and the kidney. However, not all these were equally attacked by immune  
408 reactions. Whereas pancreatic islets and the salivary gland were affected  
409 frequently in both, nude mice transplanted with *Insm1* mutant thymuses or  
410 thymus specific *Insm1* mutant mice, immune reactions in other tissues were  
411 observed only in occasionally. In addition, autoimmune responses in brown  
412 adipose tissues were observed in *Insm1* mutants, and have not been reported  
413 for *Aire* mutant mice (4, 5, 9, 10, 12, 14). In conclusion, our data show that  
414 *Insm1* is a novel regulator of mTEC development, gene expression and  
415 particularly of TRAs expression in mTECs. Mutation of *Insm1* can cause  
416 autoimmune reactions.

417

## 418 **Materials and Methods:**

### 419 **Animals**

420 *Insm1*<sup>lacZ/lacZ</sup> mice were described (26). E18.5 embryos were collected,  
421 genotyped and analyzed. A thymus specific mutation of *Insm1* was  
422 introduced by crossing *Insm1*<sup>flox/flox</sup> (28) and *Foxn1Cre* mice (JAX No.  
423 018448). Tissues collected from *Rag1*<sup>-/-</sup> mice (GemPharmatech  
424 No.T004753) were used for autoimmune antibody test. The *Insm1KI*  
425 mouse strain was generated by introducing *Insm1* coding sequences

426 preceded 5' by a stop cassette, that can be removed by Cre, into the  
427 *Rosa26* locus (Cyagen, Suzhou, China) (Fig S8). The littermate wildtype or  
428 heterozygous animals were used for control animals in the analysis. All  
429 animal experiments were approved by the institutional animal care and use  
430 committee of the Jinan University (IACUC-20211123-02).

### 431 **Thymus transplantation**

432 Thymuses were isolated from E18.5 *Insm1<sup>+/-lacZ</sup>* and *Insm1<sup>lacZ/lacZ</sup>* mice  
433 and cultured for eight days in RPMI-1640 containing 10% FBS and 1.25  
434 mM 2'-deoxyguanosine. One thymus was transplanted into renal capsule  
435 of a nude mouse (6-week-old, CD1 background) using the procedure  
436 described previously (35). Eight weeks after transplantation, the thymus  
437 and newly generated lymphocytes were collected from the nude mice,  
438 various tissues of the animals were also collected and analyzed.

### 439 **Thymic cell dissociation and mTEC isolation**

440 The fetal and adult thymic cells were dissociated using Liberase (42).  
441 In brief, the thymuses were separated and connective tissues and fat were  
442 removed. For E18.5 animals, 2-3 thymuses with of same genotype were  
443 pooled, and thymic lobes were cut into small pieces in RPMI to release the  
444 lymphocytes. Lymphocytes were collected in those cases when the entire  
445 thymic cell population was analyzed. Otherwise, the thymuses were  
446 digested in 100ul RPMI1640 containing 0.1mg/ml Liberase (Roche,  
447 Germany) and 20U/ml DNase I at 37°C for 4 minutes. The digestion  
448 procedure was repeated twice, and cells were collected after each round  
449 of digestion.

450 mTECs isolation was performed using a magnetic beads-based

451 method as previously described (43). In brief, 1 $\mu$ l biotinylated UEA1  
452 (Vector Laboratories, B-1065-2) was incubated with 25 $\mu$ l Biotin Binder  
453 Dynabeads (Thermo Fisher Scientific,11047) for 30 minutes at room  
454 temperature. Unbound UEA1 was removed by washing in 1ml FACS buffer  
455 (PBS with 0.02%BSA and 5mM EDTA). Thymuses from 2-3 E18.5 fetal or  
456 one adult mice were incubated with above prepared 25 $\mu$ l UEA1-coated  
457 beads at 4°C for 30 minutes. Unbound cells were removed by three  
458 washes with FACS buffer and by additional incubation with CD45 S-  
459 pluriBeads (pluriSelect Life Science, SKU#70-50010-11), before mTECs  
460 was collected for analysis. The isolated mTECs were used for RNA-seq,  
461 Cut&Tag and qRT-PCR analysis.

#### 462 **Flow cytometry analysis**

463 For analysis of lymphocytes in the transplanted thymuses, thymic  
464 lobes were gently cut, released lymphocytes were collected and directly  
465 stained with CD4 and CD8 antibodies in FACS buffer for flow cytometric  
466 analysis. For analysis of thymic cells, stroma cells were dissociated using  
467 Liberase as described above. Staining with antibodies recognizing cell  
468 surface proteins were performed directly in FACS buffer, whereas staining  
469 with antibodies recognizing nuclear antigens was performed after fixation  
470 for 10 minutes in 4% PFA. Foxp3 staining was performed in  
471 Foxp3/Transcription Factor Staining Buffer (Invitrogen, 00-5523-00).  
472 Immunostaining procedures were performed as described (44). The  
473 antibodies used were listed in the supplementary table 5.

474 BD FACSCanto II or FACS Aria II were used to analyze and collect  
475 cells (Beckton Dickenson, Franklin Lakes, USA). Cell quantification was

476 determined using FloJo 7.6.5 software.

477 **Immunohistochemistry, western blot analysis and hematoxylin and**  
478 **eosin (H&E) staining**

479 Immunohistochemistry and western blot analysis were performed as  
480 described (28). Fluorescence was imaged on a Zeiss LSM 700 confocal or  
481 a Leica DMI8 microscope, and the images were processed using Adobe  
482 Photoshop software. The antibodies used are listed in supplementary table  
483 5. For the autoimmune antibody tests, serum of the *KO/nu* or *Thy-*c*KO*  
484 mice was used at the concentration of 1:25 on tissue sections obtained  
485 from *Rag1<sup>-/-</sup>* mice.

486 For H&E staining, the Lillie-Mayer method was used. In brief, 5%  
487 aluminum ammonium sulphate and 0.5% hematoxylin were used to stain  
488 the nuclei, followed by 0.3% acid alcohol incubation for the differentiation  
489 of nuclear staining. Acetified eosin was used for counterstain to reveal  
490 cellular detail.

491 ***Insm1* mutants RNA-seq analysis**

492 For E18.5 mice, six to nine thymuses of each genotype (*Insm1* mutant  
493 and wildtype) were collected, and mTECs were isolated after pooling two  
494 to three thymuses of the same genotype. For 6-8 weeks mice, mTECs  
495 were isolated from each of the thymus for each genotype. Total RNAs  
496 were isolated using TRIZOL reagents. Three independent sequencing  
497 libraries for each genotype were generated using the NEBNext Ultra RNA  
498 Library Prep Kit for Illumina (NEB, USA). Illumina NovaSeq 6000 was used  
499 for sequencing, and 150-nt paired-end reads were generated. Sequencing  
500 data (6 Gb or more) with more than 94% of bases scoring above Q30

501 (accuracy rate 99.9%) were produced from each library sample. RNA-seq  
502 fastq files were aligned to the mouse genome (mm10) using STAR  
503 (v2.5.2a) (45) with parameter `--outFilterMismatchNmax 2`. The proportions  
504 of uniquely mapped reads were 79.4%-85.9%. Gene read numbers were  
505 counted using HTSeq (v0.11.0) (46) based on mouse gene annotation  
506 Ensembl v79, and the value of fragment per kilobase of exon per million  
507 reads mapped (FPKM) was calculated. Next, we used DESeq2 (v1.34.0)  
508 (47) to detect dysregulated genes under cutoff  $FDR \leq 0.1$  and fold  
509 change  $\geq 1.5$ . To analyze downregulated TRAs and dysregulating-trend  
510 genes for down-stream analysis, a looser cutoff ( $p$ -value  $\leq 0.05$  and fold  
511 change  $\geq 1.5$ ) was performed. All the RNA-seq data are accessible on Gene  
512 Expression Omnibus (GSE193929).

513 For comparison of genes dysregulated after *Aire* mutation, published  
514 data were used (31). Gene read counts were downloaded from GEO  
515 (ID:GSE144877). Differential expressed genes were analyzed according to  
516 the method used in the referred paper (31).

517 GO enrichment analysis was performed by R package topGO  
518 (v2.38.1) (48) with “classic” algorithm and “Fisher exact test”, followed by  
519 the Benjamini-Hochberg multiple test correction using  $FDR = 0.05$  as a  
520 cutoff.

### 521 **qRT-PCR analysis**

522 Cells were lysed and total RNA was isolated using TRIZOL reagent  
523 (Invitrogen). For qRT-PCR analysis, RNA was isolated from thymuses or  
524 mTECs of E18.5 fetal mice. cDNA was synthesized using HiScript II Q RT  
525 SuperMix for qPCR (+gDNA wiper) (R223-01, Vazyme, China) and

526 analyzed using SYBR Green I based real-time quantitative PCR method  
527 on a CFX96 RT-PCR system (Bio-Rad). Expression levels were  
528 determined using the  $2^{-\Delta\Delta Ct}$  method and *ActB* or *Krt5* as internal  
529 standards, and displayed as proportion of control. Primers used for  
530 quantitative analysis are listed in supplementary table S6.

### 531 **Insm1 CUT&Tag-seq analysis**

532 CUT&Tag (Cleavage Under Targets and Tagmentation) analysis was  
533 performed according to the instruction of the manufacturer (Novoprotein,  
534 N259-YH01) and previously published protocols (49). In brief, mTECs  
535 were isolated using UEA1 coupled Dynabeads from wildtype mice. 0.5 $\mu$ l of  
536 Insm1 antibody or 1 $\mu$ g IgG antibody was incubated overnight at 4°C with  
537 5x10<sup>4</sup> mTEC cells in a volume of 100 $\mu$ l first antibody buffer. Donkey anti-  
538 guinea pig (Jackson ImmunoResearch,706-005-148) secondary antibody  
539 was used and incubated with the mTEC for 45 minutes in 100 $\mu$ l secondary  
540 antibody buffer at room temperature. After washing to remove unbound  
541 antibodies, the ChiTag transposon was incubated with mTECs for one  
542 hour at room temperature. Fragmentation, DNA purification and library  
543 construction were performed according to the protocol of the manufacturer.  
544 At least three biological replicas were obtained.

545 Illumina NovaSeq 6000 was used for sequencing, and 150-nt paired-  
546 end reads were generated. At least twelve Gigabyte pass filtering  
547 sequencing data was generated. Raw CUT&Tag sequencing data was  
548 trimmed to remove adaptor sequences using fastp (v0.12.0) (50) and  
549 aligned to mouse genome (mm10) using Bowtie2 (v2.2.9) (51) with the  
550 parameters "--local --very-sensitive-local --no-unal --no-mixed --no-

551 discordant --phred33 -X 700". Peaks were called using MACS2 (v2.2.6)  
552 (52) with the parameter "--keep-dup auto". IgG data were used as a  
553 control. Insm1-binding peaks identified in three replicates with q-  
554 value<10e-5 were merged for subsequent analysis.

555 To calculate the proportions of Insm1 binding on different genomic  
556 regions, peaks were assigned to different genomic regions based on their  
557 summit positions on the Ensembl transcriptome annotation according to  
558 the priority order of CDS, 5'-UTR, 3'-UTR, promoter, ncRNA, intron, and  
559 intergenic, where the promoter were defined as the regions of -2000 bp to  
560 +500 bp of transcription start site (TSS). The CUT&Tag sequencing data  
561 are accessible on Gene Expression Omnibus (GSE193929).

#### 562 **Single-cell RNA sequencing data analysis**

563 Preprocessed transcript-by-cell matrix of scRNA-seq data of Pdpn<sup>+</sup>CD104<sup>+</sup>  
564 mTEC<sup>lo</sup> from perinatal and adult mice was downloaded from GEO  
565 (ID:GSM5831744), and read by scanpy (53) for downstream analysis. First,  
566 the valid 8,236 mTECs used in the study (18) were selected according to the  
567 barcode list provided. The gene expression matrix was normalized to counts  
568 per 10,000 counts, followed by log-transfer and scaling to unit variance and  
569 zero mean. Next, the top 2,000 highly variable genes were identified and  
570 selected, and PCA was performed for dimensionality reduction. According to  
571 the elbow point of the PC contribution curve, the top 30 PCs were used for the  
572 neighborhood graph construction, and UMAP was created for visualization.  
573 Cell clustering were preformed using the Leiden method (resolution=1.9). The  
574 scores of gene sets were calculated using the scanpy function tl.score\_genes.

#### 575 **TRA gene analysis**

576 the list of TRA genes were identified in an earlier study (54) and  
577 provided by the authors (Prof. Perreault C, Université de Montréal,  
578 personal communication). Aire-dependent TRAs were identified by the  
579 overlaps of downregulated genes from the public Aire mutant RNA-seq  
580 data (31). The TRA expression profiles of various mouse tissues were  
581 generated in pervious microarray studies (33) and downloaded from GEO  
582 (GSE10246). To visualize TRA expressions in different tissues (Figure S3),  
583 samples of each tissue were merged by mean expression values, followed  
584 by z-score normalization on each gene.

### 585 **Super enhancer analysis**

586 Super enhancer regions were identified in the published study (13) and  
587 were provided by the author via email (Prof. Diane Mathis, Harvard  
588 Medical School, personal communication). The control regions used in Fig  
589 4B were the sequences with the same length as the super enhancer and  
590 with an offset of the distance of the super enhancer length plus 200kb.

591

### 592 **Acknowledgments**

593 The authors thank Prof. Carmen Birchmeier (Max-Delbrück-Center for  
594 Molecular Medicine, Germany) for helpful discussions at the initiation of the  
595 project, for providing the *Insm1<sup>+/-lacZ</sup> Insm1<sup>+/-flox</sup>* animals and for critical  
596 reading of the manuscript. The authors thank Dr. St-Pierre, C (University of  
597 Montreal) and Prof. Perreault, C (University of Montreal) for kindly sharing  
598 the detailed information of TRAs. The authors thank Prof. Diane Mathis  
599 (Harvard Medical School) for providing the super-enhancer coordinates.  
600 The authors thank Prof. Yuanzhi Lu (Department of Pathology, The First



601 affiliated hospital of Jinan University) for the help in analyzing lymphocytes  
602 infiltration.

603

#### 604 **Funding**

605 This work was supported by the National Natural Science Foundation of  
606 China (31970856) and the Clinical Frontier Technology Program of the  
607 First Affiliated Hospital of Jinan University, China (JNU1AF-CFTP-2022-  
608 a01236).

609

#### 610 **Author Contributions**

611 W.T. designed the study and performed the molecular experiments. Y.W.  
612 and J.W. contributed to the animal experiments, tissues analysis and flow  
613 cytometry analysis. Y.W., Z.Y., W.Y. and G.Y. contributed to the molecular  
614 experiments, cells and tissues experiments. J.X. performed and managed  
615 the bioinformatic analysis and participated manuscript preparation. S.J.  
616 supervised the project, analyzed the data and wrote the manuscript. S.J. is  
617 the guarantor of this work and takes responsibility for the integrity of the  
618 data and the accuracy of the data analysis.

619

#### 620 **References**

- 621 1. Takahama Y (2006) Journey through the thymus: stromal guides for T-cell  
622 development and selection. *Nat Rev Immunol* 6(2):127-135.
- 623 2. Alves NL, *et al.* (2014) Serial progression of cortical and medullary thymic  
624 epithelial microenvironments. *Eur J Immunol* 44(1):16-22.
- 625 3. Kyewski B & Derbinski J (2004) Self-representation in the thymus: an  
626 extended view. *Nat Rev Immunol* 4(9):688-698.
- 627 4. Ramsey C, *et al.* (2002) Aire deficient mice develop multiple features of  
628 APECED phenotype and show altered immune response. *Hum Mol Genet*  
629 11(4):397-409.

- 630 5. Anderson MS, *et al.* (2002) Projection of an immunological self shadow  
631 within the thymus by the aire protein. *Science* 298(5597):1395-1401.
- 632 6. Abramson J, Giraud M, Benoist C, & Mathis D (2010) Aire's partners in the  
633 molecular control of immunological tolerance. *Cell* 140(1):123-135.
- 634 7. Anderson AO & Shaw S (2005) Conduit for privileged communications in the  
635 lymph node. *Immunity* 22(1):3-5.
- 636 8. Chuprin A, *et al.* (2015) The deacetylase Sirt1 is an essential regulator of  
637 Aire-mediated induction of central immunological tolerance. *Nat Immunol*  
638 16(7):737-745.
- 639 9. Danso-Abeam D, Humblet-Baron S, Dooley J, & Liston A (2011) Models of  
640 aire-dependent gene regulation for thymic negative selection. *Front Immunol*  
641 2:14.
- 642 10. Giraud M, *et al.* (2012) Aire unleashes stalled RNA polymerase to induce  
643 ectopic gene expression in thymic epithelial cells. *Proc Natl Acad Sci U S A*  
644 109(2):535-540.
- 645 11. Matsumoto M, *et al.* (2013) Which model better fits the role of aire in the  
646 establishment of self-tolerance: the transcription model or the maturation  
647 model? *Front Immunol* 4:210.
- 648 12. Oven I, *et al.* (2007) AIRE recruits P-TEFb for transcriptional elongation of  
649 target genes in medullary thymic epithelial cells. *Mol Cell Biol* 27(24):8815-  
650 8823.
- 651 13. Bansal K, Yoshida H, Benoist C, & Mathis D (2017) The transcriptional  
652 regulator Aire binds to and activates super-enhancers. *Nat Immunol* 18(3):263-  
653 273.
- 654 14. Guerau-de-Arellano M, Martinic M, Benoist C, & Mathis D (2009) Neonatal  
655 tolerance revisited: a perinatal window for Aire control of autoimmunity. *J*  
656 *Exp Med* 206(6):1245-1252.
- 657 15. Gabler J, Arnold J, & Kyewski B (2007) Promiscuous gene expression and the  
658 developmental dynamics of medullary thymic epithelial cells. *Eur J Immunol*  
659 37(12):3363-3372.
- 660 16. Yang S, Fujikado N, Kolodin D, Benoist C, & Mathis D (2015) Immune  
661 tolerance. Regulatory T cells generated early in life play a distinct role in  
662 maintaining self-tolerance. *Science* 348(6234):589-594.
- 663 17. Baran-Gale J, *et al.* (2020) Ageing compromises mouse thymus function and  
664 remodels epithelial cell differentiation. *Elife* 9.
- 665 18. Michelson DA, Hase K, Kaisho T, Benoist C, & Mathis D (2022) Thymic  
666 epithelial cells co-opt lineage-defining transcription factors to eliminate  
667 autoreactive T cells. *Cell* 185(14):2542-2558 e2518.
- 668 19. Miller CN, *et al.* (2018) Thymic tuft cells promote an IL-4-enriched medulla  
669 and shape thymocyte development. *Nature* 559(7715):627-631.
- 670 20. Bornstein C, *et al.* (2018) Single-cell mapping of the thymic stroma identifies  
671 IL-25-producing tuft epithelial cells. *Nature* 559(7715):622-626.
- 672 21. Dhalla F, *et al.* (2020) Biologically indeterminate yet ordered promiscuous  
673 gene expression in single medullary thymic epithelial cells. *EMBO J*  
674 39(1):e101828.
- 675 22. Bautista JL, *et al.* (2021) Single-cell transcriptional profiling of human thymic  
676 stroma uncovers novel cellular heterogeneity in the thymic medulla. *Nat*  
677 *Commun* 12(1):1096.
- 678 23. Michelson DA & Mathis D (2022) Thymic mimetic cells: tolerogenic  
679 masqueraders. *Trends Immunol* 43(10):782-791.

- 680 24. Wells KL, *et al.* (2020) Combined transient ablation and single-cell RNA-  
681 sequencing reveals the development of medullary thymic epithelial cells. *Elife*  
682 9.
- 683 25. Herzig Y, *et al.* (2017) Transcriptional programs that control expression of the  
684 autoimmune regulator gene Aire. *Nat Immunol* 18(2):161-172.
- 685 26. Gierl MS, Karoulias N, Wende H, Strehle M, & Birchmeier C (2006) The  
686 zinc-finger factor Insm1 (IA-1) is essential for the development of pancreatic  
687 beta cells and intestinal endocrine cells. *Genes Dev* 20(17):2465-2478.
- 688 27. Jia S, Wildner H, & Birchmeier C (2015) Insm1 controls the differentiation of  
689 pulmonary neuroendocrine cells by repressing Hes1. *Dev Biol* 408(1):90-98.
- 690 28. Jia S, *et al.* (2015) Insm1 cooperates with Neurod1 and Foxa2 to maintain  
691 mature pancreatic beta-cell function. *EMBO J* 34(10):1417-1433.
- 692 29. Welcker JE, *et al.* (2013) Insm1 controls development of pituitary endocrine  
693 cells and requires a SNAG domain for function and for recruitment of histone-  
694 modifying factors. *Development* 140(24):4947-4958.
- 695 30. Anderson G, *et al.* (2014) Mechanisms of thymus medulla development and  
696 function. *Curr Top Microbiol Immunol* 373:19-47.
- 697 31. Tomofuji Y, *et al.* (2020) Chd4 choreographs self-antigen expression for  
698 central immune tolerance. *Nat Immunol* 21(8):892-901.
- 699 32. Derbinski J, Schulte A, Kyewski B, & Klein L (2001) Promiscuous gene  
700 expression in medullary thymic epithelial cells mirrors the peripheral self. *Nat*  
701 *Immunol* 2(11):1032-1039.
- 702 33. Lattin JE, *et al.* (2008) Expression analysis of G Protein-Coupled Receptors in  
703 mouse macrophages. *Immunome Res* 4:5.
- 704 34. Goldfarb Y, *et al.* (2021) Mechanistic dissection of dominant AIRE mutations  
705 in mouse models reveals AIRE autoregulation. *J Exp Med* 218(11).
- 706 35. Wang J, *et al.* (2019) Renal Subcapsular Transplantation of 2'-  
707 Deoxyguanosine-Treated Murine Embryonic Thymus in Nude Mice. *J Vis Exp*  
708 (149).
- 709 36. Jacob J, *et al.* (2009) Insm1 (IA-1) is an essential component of the regulatory  
710 network that specifies monoaminergic neuronal phenotypes in the vertebrate  
711 hindbrain. *Development* 136(14):2477-2485.
- 712 37. Wildner H, Gierl MS, Strehle M, Pla P, & Birchmeier C (2008) Insm1 (IA-1)  
713 is a crucial component of the transcriptional network that controls  
714 differentiation of the sympatho-adrenal lineage. *Development* 135(3):473-481.
- 715 38. Wiwatpanit T, *et al.* (2018) Trans-differentiation of outer hair cells into inner  
716 hair cells in the absence of INSM1. *Nature* 563(7733):691-695.
- 717 39. Kont V, *et al.* (2008) Modulation of Aire regulates the expression of tissue-  
718 restricted antigens. *Mol Immunol* 45(1):25-33.
- 719 40. Fornari TA, *et al.* (2010) Age-related deregulation of Aire and peripheral  
720 tissue antigen genes in the thymic stroma of non-obese diabetic (NOD) mice is  
721 associated with autoimmune type 1 diabetes mellitus (DM-1). *Mol Cell*  
722 *Biochem* 342(1-2):21-28.
- 723 41. Oliveira EH, *et al.* (2016) Aire Downregulation Is Associated with Changes in  
724 the Posttranscriptional Control of Peripheral Tissue Antigens in Medullary  
725 Thymic Epithelial Cells. *Front Immunol* 7:526.
- 726 42. Seach N, Wong K, Hammett M, Boyd RL, & Chidgey AP (2012) Purified  
727 enzymes improve isolation and characterization of the adult thymic  
728 epithelium. *J Immunol Methods* 385(1-2):23-34.

- 729 43. Dohr D, Engelmann R, & Muller-Hilke B (2019) A novel method to  
730 efficiently isolate medullary thymic epithelial cells from murine thymi based  
731 on UEA-1 MicroBeads. *J Immunol Methods* 467:12-18.
- 732 44. Griger J, *et al.* (2017) Loss of Ptpn11 (Shp2) drives satellite cells into  
733 quiescence. *Elife* 6.
- 734 45. Dobin A, *et al.* (2013) STAR: ultrafast universal RNA-seq aligner.  
735 *Bioinformatics* 29(1):15-21.
- 736 46. Anders S, Pyl PT, & Huber W (2015) HTSeq--a Python framework to work  
737 with high-throughput sequencing data. *Bioinformatics* 31(2):166-169.
- 738 47. Love MI, Huber W, & Anders S (2014) Moderated estimation of fold change  
739 and dispersion for RNA-seq data with DESeq2. *Genome Biology* 15(12).
- 740 48. Rahnenfuhrer AAJ (2016) topGO: Enrichment Analysis for Gene Ontology.
- 741 49. Kaya-Okur HS, *et al.* (2019) CUT&Tag for efficient epigenomic profiling of  
742 small samples and single cells. *Nat Commun* 10(1):1930.
- 743 50. Chen S, Zhou Y, Chen Y, & Gu J (2018) fastp: an ultra-fast all-in-one FASTQ  
744 preprocessor. *Bioinformatics* 34(17):i884-i890.
- 745 51. Langmead B & Salzberg SL (2012) Fast gapped-read alignment with Bowtie  
746 2. *Nat Methods* 9(4):357-359.
- 747 52. Zhang Y, *et al.* (2008) Model-based analysis of ChIP-Seq (MACS). *Genome*  
748 *Biol* 9(9):R137.
- 749 53. Wolf FA, Angerer P, & Theis FJ (2018) SCANPY: large-scale single-cell  
750 gene expression data analysis. *Genome Biol* 19(1):15.
- 751 54. St-Pierre C, Trofimov A, Brochu S, Lemieux S, & Perreault C (2015)  
752 Differential Features of AIRE-Induced and AIRE-Independent Promiscuous  
753 Gene Expression in Thymic Epithelial Cells. *J Immunol* 195(2):498-506.
- 754 55. Szot GL, Koudria P, & Bluestone JA (2007) Transplantation of pancreatic  
755 islets into the kidney capsule of diabetic mice. *J Vis Exp* (9):404.
- 756

757

## 758 **Figure legends**

### 759 **Figure 1. *Insm1* is expressed in thymic epithelial cells**

760 (A) Immunofluorescence analysis using antibodies against  $\beta$ -gal (red) and  
761 *Insm1* (green); analyzed were thymuses of E18.5 *Insm1*<sup>+/*lacZ*</sup> and  
762 *Insm1*<sup>*lacZ*/*lacZ*</sup> mice. DAPI (55) was used as a counterstain. Scale  
763 bar=40 $\mu$ m. (B) Immunofluorescence analysis of thymuses at E18.5 using  
764 antibodies against *Insm1* (red), EpCAM (green) and DAPI (55). EpCAM is  
765 expressed in thymic epithelial cells and labels the cell membrane and  
766 cytoplasm. Yellow arrowheads indicated the cytoplasmic and nuclear  
767 location of *Insm1*, and the magenta arrowhead indicated a nucleus. Scale

768 bar=10 $\mu$ m.  
769 (C,D) Immunofluorescence analysis of thymuses of E18.5 (C) and 6 weeks  
770 old (D) mice using antibodies against *Insm1* (red), *Krt5* (green) and *Krt8*  
771 (55). Magnifications are shown in the panels on the right. Scale  
772 bar=100 $\mu$ m; and 20 $\mu$ m in magnified panels. (E) Immunofluorescence  
773 analysis detected *Insm1* (green) and *Aire* (red) in thymuses of E18.5 mice.  
774 *Insm1* is co-localized with *Aire*. Yellow arrowheads indicated the cell  
775 expressing only *Insm1*, magenta arrowheads indicated cells expressing  
776 only *Aire*. Scale bar=40 $\mu$ m. Quantification of single and double positive  
777 cells is shown on the right (animal number n=3, around 300  
778 cells/animal/antibody were counted). (F) *Insm1* expressing in post-*Aire*  
779 mTECs (Pdpn<sup>-</sup>CD104<sup>-</sup>) analyzed using the published perinatal (left) and  
780 adult (right) scRNA-seq data (18). (G) *Aire* expressing in post-*Aire* mTECs  
781 (Pdpn<sup>-</sup>CD104<sup>-</sup>) analyzed using the published perinatal (left) and adult  
782 (right) scRNA-seq data (18).

783 **Figure 2. Cellular phenotypes observed in the *Insm1* mutant thymus**

784 (A,B) Immunofluorescence analysis of thymuses of 6-week-old mice using  
785 antibodies against (A) *Foxa2* (green) and *Insm1* (red), and (B) *ChgA*  
786 (green) and *Insm1* (red). Scale bar=25 $\mu$ m and 10 $\mu$ m in the main and  
787 magnified panels, respectively. (C) Flow cytometry analysis of CD45<sup>-</sup>  
788 /EpCAM<sup>+</sup> epithelial cells (the upper panel) and CD45<sup>-</sup>/EpCAM<sup>+</sup>/UEA1<sup>+</sup>  
789 mTECs (the lower panel) in thymuses of *Insm1* mutant and wildtype mice  
790 (n=11). (D) Flow cytometry analysis of CD45<sup>-</sup>/EpCAM<sup>+</sup> epithelial cells (the  
791 upper panel) and CD45<sup>-</sup>/EpCAM<sup>+</sup>/UEA1<sup>+</sup> mTECs (the lower panel) in  
792 thymuses of *Thy-cKO* and wildtype mice (n=6). (E) Flow cytometry

793 analysis of Aire<sup>+</sup> cells in *Insm1* mutant and wildtype control animals at the  
794 age of E18.5 and adult (animal number n=4 for each genotype). Isotype  
795 control staining for Aire was showed on the left, quantifications were  
796 showed on the right of the panel. (F) Quantitative RT-PCR analysis of the  
797 expression of the mimetic cells specific genes. Upper panel showed the  
798 genes specific expressed in the mimetic cell types refereed to the  
799 published data (18). Red labeled the downregulated genes in *Insm1*  
800 mutants. Lower panel showed the qRT-PCR results. Significant  
801 downregulated genes were labeled red in the upper panel. Data in the  
802 figure panel are presented as means  $\pm$  SD, statistical significance was  
803 assessed by 2-tailed unpaired Student's t-test. Statistically significant was  
804 defined as  $p < 0.05$ .

805 **Figure 3. Changes in gene expression in the *Insm1* mutant thymus**

806 (A) Immunofluorescence analysis of the expression of  $\beta$ -galactosidase ( $\beta$ -  
807 gal, red) and Aire (green) in thymuses of E18.5 mice. DAPI (55) was used  
808 as a counterstain. Quantifications of the fluorescence intensity are shown  
809 on the right (animal number n=4 for each genotype, 80-100 Aire<sup>+</sup>/ $\beta$ -gal<sup>+</sup>  
810 cells were counted). Scale bar=20 $\mu$ m. (B,C) Quantitative RT-PCR analysis  
811 of the expression of *Aire* and *TRA* genes in mTECs of E18.5 (B) and at  
812 adults (C) (n=4). Data in the figure panel are presented as means  $\pm$  SD,  
813 statistical significance was assessed by 2-tailed unpaired Student's t-test.  
814 ns:  $p > 0.05$ ; \*:  $p < 0.05$ , \*\*:  $p < 0.01$ , \*\*\*:  $p < 0.001$ . (D,E) Volcano blots of the  
815 RNA-seq data in *Insm1* mutants versus wildtype controls at E18.5 (D) and  
816 adult stages (E).  $FDR \leq 0.1$  or  $p\text{-value} \leq 0.05$  combined with Fold change  $\geq 1.5$   
817 were used for identifying the dysregulated genes. The numbers of the

818 dysregulated genes were showed in figures accordingly. (F) Expression  
819 distribution of the *Insm1*-dependent genes ( $FDR \leq 0.1, FC \geq 1.5$ ) in mimetic  
820 cells. Presented by the violin plots of the gene score for each cell of the  
821 post-Aire mTECs. Left panel, downregulated gene in E18.5 *Insm1* mutant  
822 mice plotted on published perinatal scRNA-seq data; right panel,  
823 downregulated genes in adult *Insm1* mutant mice plotted on published  
824 adult scRNA-seq data. (G) Heatmap of dysregulated TRA genes  
825 expressed in mTEC of *cKO* mice. (H) expression distribution of the *Insm1*-  
826 dependent TRA genes ( $p \leq 0.05, FC \geq 1.5$ ) in mimetic cells. Presented by the  
827 violin plots of the gene score for each cell of the post-Aire mTECs. Left  
828 panel, the dysregulated TRAs genes in E18.5 *Insm1* mutant mice plotted  
829 on published perinatal scRNA-seq data; right panel, the dysregulated  
830 TRAs genes in adult *Insm1* mutant mice plotted on published adult scRNA-  
831 seq data.

832 **Figure 4. *Insm1* promotes thymic gene expression in the thymus**

833 (A) Immunofluorescence analysis of the expression of *Insm1* (green), and  
834 *Krt5* (red, upper panels), *Aire* (red, lower panels) in *Insm1*-overexpression  
835 (*Insm1OE*) thymuses of postnatal 2-day animals. DAPI (55) was used as a  
836 counterstain. (B-C) Comparison of gene expression in *Insm1OE* and  
837 control thymuses using postnatal 2-day animals (animal number n=5-6) (B)  
838 and mTECs (animal number n=3-4) (C) using qRT-PCR. Data are  
839 presented as means  $\pm$  SD, statistical significance was assessed by 2-  
840 tailed unpaired Student's t-test. \*:  $p < 0.05$ , \*\*:  $p < 0.01$ , \*\*\*:  $p < 0.001$ .

841 **Figure 5. *Insm1* binds to super-enhancer loci**

842 (A, B) Distribution of *Insm1* binding sites in mTEC genome at the E18.5

843 stage (A) and at the adult stage (B). (C,D) the *Insm1* binding traces on  
844 dysregulated genes at the E18.5 stage (C) and at the adult stage (D). (E)  
845 Proportions of genes with *Insm1* binding sites in the promoter regions (-  
846 2000bp to +500bp of TSS) at the E18.5 stage (left) and adult stage (right).  
847 *Insm1* binding sites are significantly depleted on the promoters of  
848 dysregulated genes (F) Density curves of detected loci *Insm1* and *Aire* co-  
849 binding (55), *Insm1*-only binding (orange), and *Aire*-only binding (green),  
850 aligned to the center (0 position) of the super-enhancers. (G,H) Proportion  
851 of *Insm1* binding peaks overlapping with super-enhancer and control loci  
852 at the E18.5 stage (G) and the adult stage (H). An identical length  
853 sequence located 200kb plus the length of super-enhancer away from  
854 each super-enhancer was selected as the control sequence. (I)  
855 Proportions of super-enhancers located within  $\pm 500$ kb of genes that were  
856 dysregulated ( $p$ -value $\leq 0.05$ ,  $FC \geq 1.5$ ) in *Insm1* mutant mTECs at the E18.5  
857 stage. Stratified by the super-enhancers bound or unbound by *Insm1*. In  
858 (E), (G), (H) and (I), numerators and denominators of each proportion are  
859 given above the bars. The bars show 95% confidential intervals. The  $p$ -  
860 values of Fisher test are also given.

861 **Figure 6. Transplantation of *Insm1* mutant thymuses in nude mice**

862 (A) Schematic outline for transplantation experiments. Thymuses were  
863 isolated, depleted for lymphocytes by 8-day culture in 2-deoxygranosine,  
864 transplanted into nude mice, and the mice were analyzed 8 weeks after  
865 transplantation. (B) Transplantation of the thymus under the kidney  
866 capsule of the nude mouse. Enlarged picture shows the kidney with the  
867 transplanted thymus. (C) Isolated kidneys showing the thymuses under the



868 kidney capsule 8-week after transplantation. *Het/nu*: the thymus was  
869 isolated from an *Insm1*<sup>+/lacZ</sup> mouse and transplanted into a nude mouse;  
870 *KO/nu*: the thymus was isolated from an *Insm1*<sup>lacZ/lacZ</sup> mouse and  
871 transplanted into a nude mouse. (D) CD4 and CD8 $\alpha$  staining and flow  
872 cytometry analysis of thymocytes isolated from the transplanted thymuses  
873 of *Het/nu* and *KO/nu* mice (n=3). (E) Appearance (upper panel) and  
874 quantification of the weight (lower panel) of spleens isolated from *Het/nu*  
875 and *KO/nu* mice (n=5-6). (F) H&E staining shows the structures of spleens  
876 isolated from *Het/nu* and *KO/nu* mice. (G) Summary of lymphocytes  
877 infiltration in multiple tissues of *Het/nu* and *KO/nu* mice (n=6). (H) H&E  
878 staining of the pancreas, the lung, the kidney and the salivary gland  
879 isolated from *Het/nu* and *KO/nu* mice. 6-8 sections from the non-serial  
880 sections were used for H&E staining for each tissue. Red arrows indicate  
881 sites of lymphocytes infiltration. (I) Immunostaining using serum (green)  
882 isolated from *Het/nu* and *KO/nu* mice on sections that were prepared from  
883 *Rag1*<sup>-/-</sup> mice. 3-4 sections collected from the non-serial sections of two  
884 *Rag1*<sup>-/-</sup> mice were used for the serum staining for each tissue. (J) Shown is  
885 the co-staining of the *KO/nu* serum (green) with pancreatic islet specific  
886 hormones PP, Gcg, Sst and Insulin (red, as indicated in the panels).  
887 Statistical data are presented as means  $\pm$  SD, significance was assessed  
888 by 2-tailed unpaired Student's t-test. \*:  $p < 0.05$ .

889 **Figure 7. Autoimmune phenotype in thymus specific *Insm1* mutant**  
890 **mice**

891 (A) CD4 and CD8 $\alpha$  staining and flow cytometry analysis of thymocytes  
892 from thymuses of *Thy-cKO* and wildtype mice (mean and SD showed in

893 figures, n=10-12). (B) CD4 and CD8 $\alpha$  staining and flow cytometry analysis  
894 of thymocytes from axillary lymph nodes of *Thy-cKO* and wildtype mice  
895 (mean and SD showed in figures, n=9). (C, D) Flow cytometry analysis of  
896 CD4<sup>+</sup>/CD25<sup>+</sup>/Foxp3<sup>+</sup> Treg cells from the thymus (C, n=8) and the axillary  
897 lymph node (D, n=9) of *Thy-cKO* and wildtype mice. (E) H&E staining of  
898 brown fat, pancreas, salivary gland, liver and lung in *Thy-cKO* and *Insm1<sup>ff</sup>*  
899 or *Foxn1Cre* control mice. 6-8 sections from the non-serial sections were  
900 used for H&E staining for each tissue. Animal numbers were list in Table 1.  
901 (F) Immunostaining using serum isolated from *Thy-Cko* and *Insm1<sup>ff</sup>* or  
902 *Foxn1Cre* mice on sections of pancreas, salivary gland and ovary  
903 prepared from *Rag1<sup>-/-</sup>* mice. 3-4 sections collected from the non-serial  
904 sections of two *Rag1<sup>-/-</sup>* mice were used for the serum staining for each  
905 tissue. The animals that the serum was collected were list in Table 2.  
906 Statistical data are presented as means  $\pm$  SD, significance was assessed  
907 by 2-tailed unpaired Student's t-test.  $P > 0.05$  in figure A and B,  $p$ -values  
908 showed in figures C and D.

909

910

911

912

913

914

915

916

917

918

919

920

921

922

923

924

925

926

**Table 1. Lymphocytes infiltration in tissues**

| Genotypes       | 17-month       |     |     |    |    |     |     |     |     | 6-month        |     |    |     |     |     |     | 6-week         |    |    |    |     |    |    |    |    |
|-----------------|----------------|-----|-----|----|----|-----|-----|-----|-----|----------------|-----|----|-----|-----|-----|-----|----------------|----|----|----|-----|----|----|----|----|
|                 | <i>thy-cKO</i> |     |     |    |    | Ctl |     |     |     | <i>thy-cKO</i> |     |    |     | Ctl |     |     | <i>thy-cKO</i> |    |    |    | Ctl |    |    |    |    |
| Mice            | 1              | 2   | 3   | 4  | 5  | 6   | 7   | 8   | 9   | 10             | 11  | 12 | 13  | 14  | 15  | 16  | 17             | 18 | 19 | 20 | 21  | 22 | 23 | 24 | 25 |
| Gender          | F              | F   | F   | M  | M  | F   | F   | M   | M   | F              | F   | F  | F   | F   | F   | F   | F              | F  | F  | F  | F   | F  | F  | F  | F  |
| Pancreas        | +              | -   | -   | +  | ++ | -   | -   | -   | -   | -              | -   | -  | -   | -   | -   | -   | -              | -  | -  | -  | -   | -  | -  | -  | -  |
| Salivary gland  | ++             | +/- | -   | ++ | ++ | +/- | +/- | +/- | +/- | +/-            | +/- | +  | +   | nt  | +/- | +/- | -              | +  | -  | +  | -   | -  | -  | -  | -  |
| Liver           | ++             | +/- | +/- | -  | nt | +/- | +/- | nt  | -   | +/-            | ++  | ++ | +/- | -   | +/- | +/- | -              | +  | -  | -  | -   | -  | -  | -  | -  |
| Kidney          | -              | -   | -   | -  | -  | -   | -   | -   | -   | -              | -   | -  | -   | -   | -   | -   | -              | -  | -  | -  | -   | -  | -  | -  | -  |
| Spleen          | -              | -   | -   | -  | -  | -   | -   | -   | -   | -              | -   | -  | -   | -   | -   | -   | -              | -  | -  | -  | -   | -  | -  | -  | -  |
| Brain           | -              | -   | -   | -  | -  | -   | -   | -   | -   | -              | -   | -  | -   | -   | -   | -   | -              | -  | -  | -  | -   | -  | -  | -  | -  |
| Ovary           | -              | -   | -   | -  | -  | -   | -   | -   | -   | -              | -   | -  | -   | -   | -   | -   | -              | -  | -  | -  | -   | -  | -  | -  | -  |
| Intestine       | -              | -   | -   | nt | -  | -   | -   | -   | -   | -              | -   | -  | -   | -   | -   | -   | -              | -  | -  | -  | -   | nt | -  | -  | -  |
| Colon           | -              | -   | -   | -  | -  | -   | -   | -   | -   | -              | -   | -  | -   | -   | -   | -   | -              | -  | -  | -  | -   | -  | -  | -  | -  |
| Stomach         | -              | -   | -   | -  | -  | -   | -   | -   | -   | -              | -   | -  | -   | -   | -   | -   | -              | -  | -  | -  | -   | -  | -  | -  | -  |
| Eye             | -              | -   | -   | -  | -  | -   | -   | -   | -   | -              | -   | -  | -   | -   | -   | -   | -              | -  | -  | -  | -   | -  | -  | -  | -  |
| Ganglia         | -              | -   | -   | -  | -  | -   | -   | -   | -   | -              | -   | -  | -   | -   | -   | -   | -              | -  | -  | -  | -   | -  | -  | -  | -  |
| Heart           | -              | -   | -   | -  | -  | -   | -   | -   | -   | -              | -   | -  | -   | -   | -   | -   | -              | -  | -  | -  | -   | -  | -  | -  | -  |
| Lung            | ++             | -   | -   | +  | -  | -   | -   | -   | -   | -              | -   | -  | -   | -   | -   | -   | -              | -  | -  | -  | -   | -  | -  | -  | -  |
| Skeletal muscle | -              | -   | -   | -  | -  | -   | -   | -   | -   | -              | -   | -  | -   | -   | -   | -   | -              | nt | -  | nt | -   | -  | nt | -  | -  |
| Brown fat       | -              | +   | ++  | -  | -  | -   | -   | -   | -   | -              | -   | -  | -   | -   | -   | -   | -              | -  | -  | -  | -   | -  | -  | -  | -  |
| Testis          |                |     |     | -  | -  |     |     |     |     |                |     |    |     |     |     |     |                |    |    |    |     |    |    |    |    |

927 Severe infiltration: ++; frequently observed infiltration: +; occasionally observed infiltration: +/-; Negative: -; nt: not test. F: female; M: male.

928

929

930

**Table 2. Autoimmune antibody reaction in tissues**

| Genotypes       | 17-month       |   |   |    |   |            |   |   |   | 12-month       |    |    |            |    |    | 6-month        |    |    |    |            |    |    |    |    |    |    |    |
|-----------------|----------------|---|---|----|---|------------|---|---|---|----------------|----|----|------------|----|----|----------------|----|----|----|------------|----|----|----|----|----|----|----|
|                 | <i>thy-cKO</i> |   |   |    |   | <i>Ctl</i> |   |   |   | <i>thy-cKO</i> |    |    | <i>Ctl</i> |    |    | <i>thy-cKO</i> |    |    |    | <i>Ctl</i> |    |    |    |    |    |    |    |
| Mice            | 1              | 2 | 3 | 4  | 5 | 6          | 7 | 8 | 9 | 26             | 27 | 28 | 29         | 30 | 31 | 10             | 11 | 12 | 13 | 14         | 15 | 16 | 17 | 32 | 33 | 34 | 35 |
| Gender          | F              | F | F | M  | M | F          | F | M | M | F              | F  | M  | F          | F  | M  | F              | F  | F  | F  | F          | F  | F  | F  | M  | M  | M  | M  |
| Pancreas        | +              | - | - | -  | + | -          | - | - | - | -              | -  | -  | -          | -  | -  | -              | -  | -  | -  | -          | -  | +  | +  | -  | -  | -  | -  |
| Salivary gland  | -              | - | - | ++ | - | -          | - | - | - | +              | -  | -  | -          | -  | -  | +              | -  | -  | +  | -          | -  | -  | -  | -  | -  | -  | -  |
| Liver           | -              | - | - | -  | - | -          | - | - | - | +              | -  | -  | -          | -  | -  | -              | -  | -  | -  | -          | -  | -  | -  | -  | -  | -  | -  |
| Kidney          | -              | - | - | -  | - | -          | - | - | - | +              | -  | -  | -          | -  | -  | -              | -  | -  | -  | -          | -  | -  | -  | -  | -  | -  | -  |
| Brain           | -              | - | - | -  | - | -          | - | - | - | -              | -  | -  | -          | -  | -  | -              | -  | -  | -  | -          | -  | -  | -  | -  | -  | -  | -  |
| Ovary           | -              | - | - | -  | - | -          | - | - | - | -              | -  | -  | -          | -  | -  | -              | +  | +  | +  | -          | -  | -  | -  | -  | -  | -  | -  |
| Intestine       | -              | - | - | -  | - | -          | - | - | - | -              | -  | -  | -          | -  | -  | -              | -  | -  | -  | -          | -  | -  | -  | -  | -  | -  | -  |
| Colon           | -              | - | - | +  | - | -          | - | - | - | -              | +  | -  | -          | -  | -  | -              | -  | -  | -  | -          | -  | -  | -  | -  | -  | -  | -  |
| Stomach         | -              | - | - | -  | - | -          | - | - | - | -              | -  | -  | -          | -  | -  | -              | -  | -  | -  | -          | -  | -  | -  | -  | -  | -  | -  |
| Eye             | -              | - | - | -  | - | -          | - | - | - | -              | -  | -  | -          | -  | -  | -              | -  | -  | -  | -          | -  | -  | -  | -  | -  | -  | -  |
| Ganglia         | -              | - | - | -  | - | -          | - | - | - | -              | -  | -  | -          | -  | -  | -              | -  | -  | -  | -          | -  | -  | -  | -  | -  | -  | -  |
| Nerve fiber     | -              | - | - | -  | - | -          | - | - | - | -              | -  | -  | -          | -  | -  | -              | -  | -  | -  | -          | -  | -  | -  | -  | -  | -  | -  |
| Heart           | -              | - | - | -  | - | -          | - | - | - | +              | +  | -  | -          | -  | -  | -              | -  | -  | -  | -          | -  | -  | -  | -  | -  | -  | -  |
| Lung            | -              | - | - | -  | - | -          | - | - | - | -              | -  | -  | -          | -  | -  | -              | -  | -  | -  | -          | -  | -  | -  | -  | -  | -  | -  |
| Skeletal muscle | -              | - | - | -  | - | -          | - | - | - | +              | +  | -  | -          | -  | -  | -              | -  | -  | -  | -          | -  | -  | -  | -  | -  | -  | -  |
| Brown fat       | -              | - | - | -  | - | -          | - | - | - | -              | -  | +  | -          | -  | -  | -              | -  | -  | -  | -          | -  | -  | -  | -  | -  | -  | -  |
| Testis          | -              | - | - | -  | - | -          | - | - | - | -              | -  | -  | -          | -  | -  | -              | -  | -  | -  | -          | -  | -  | -  | -  | -  | -  | -  |

Severe positive: ++; Positive: +; Negative: -. F: female; M: male.

931



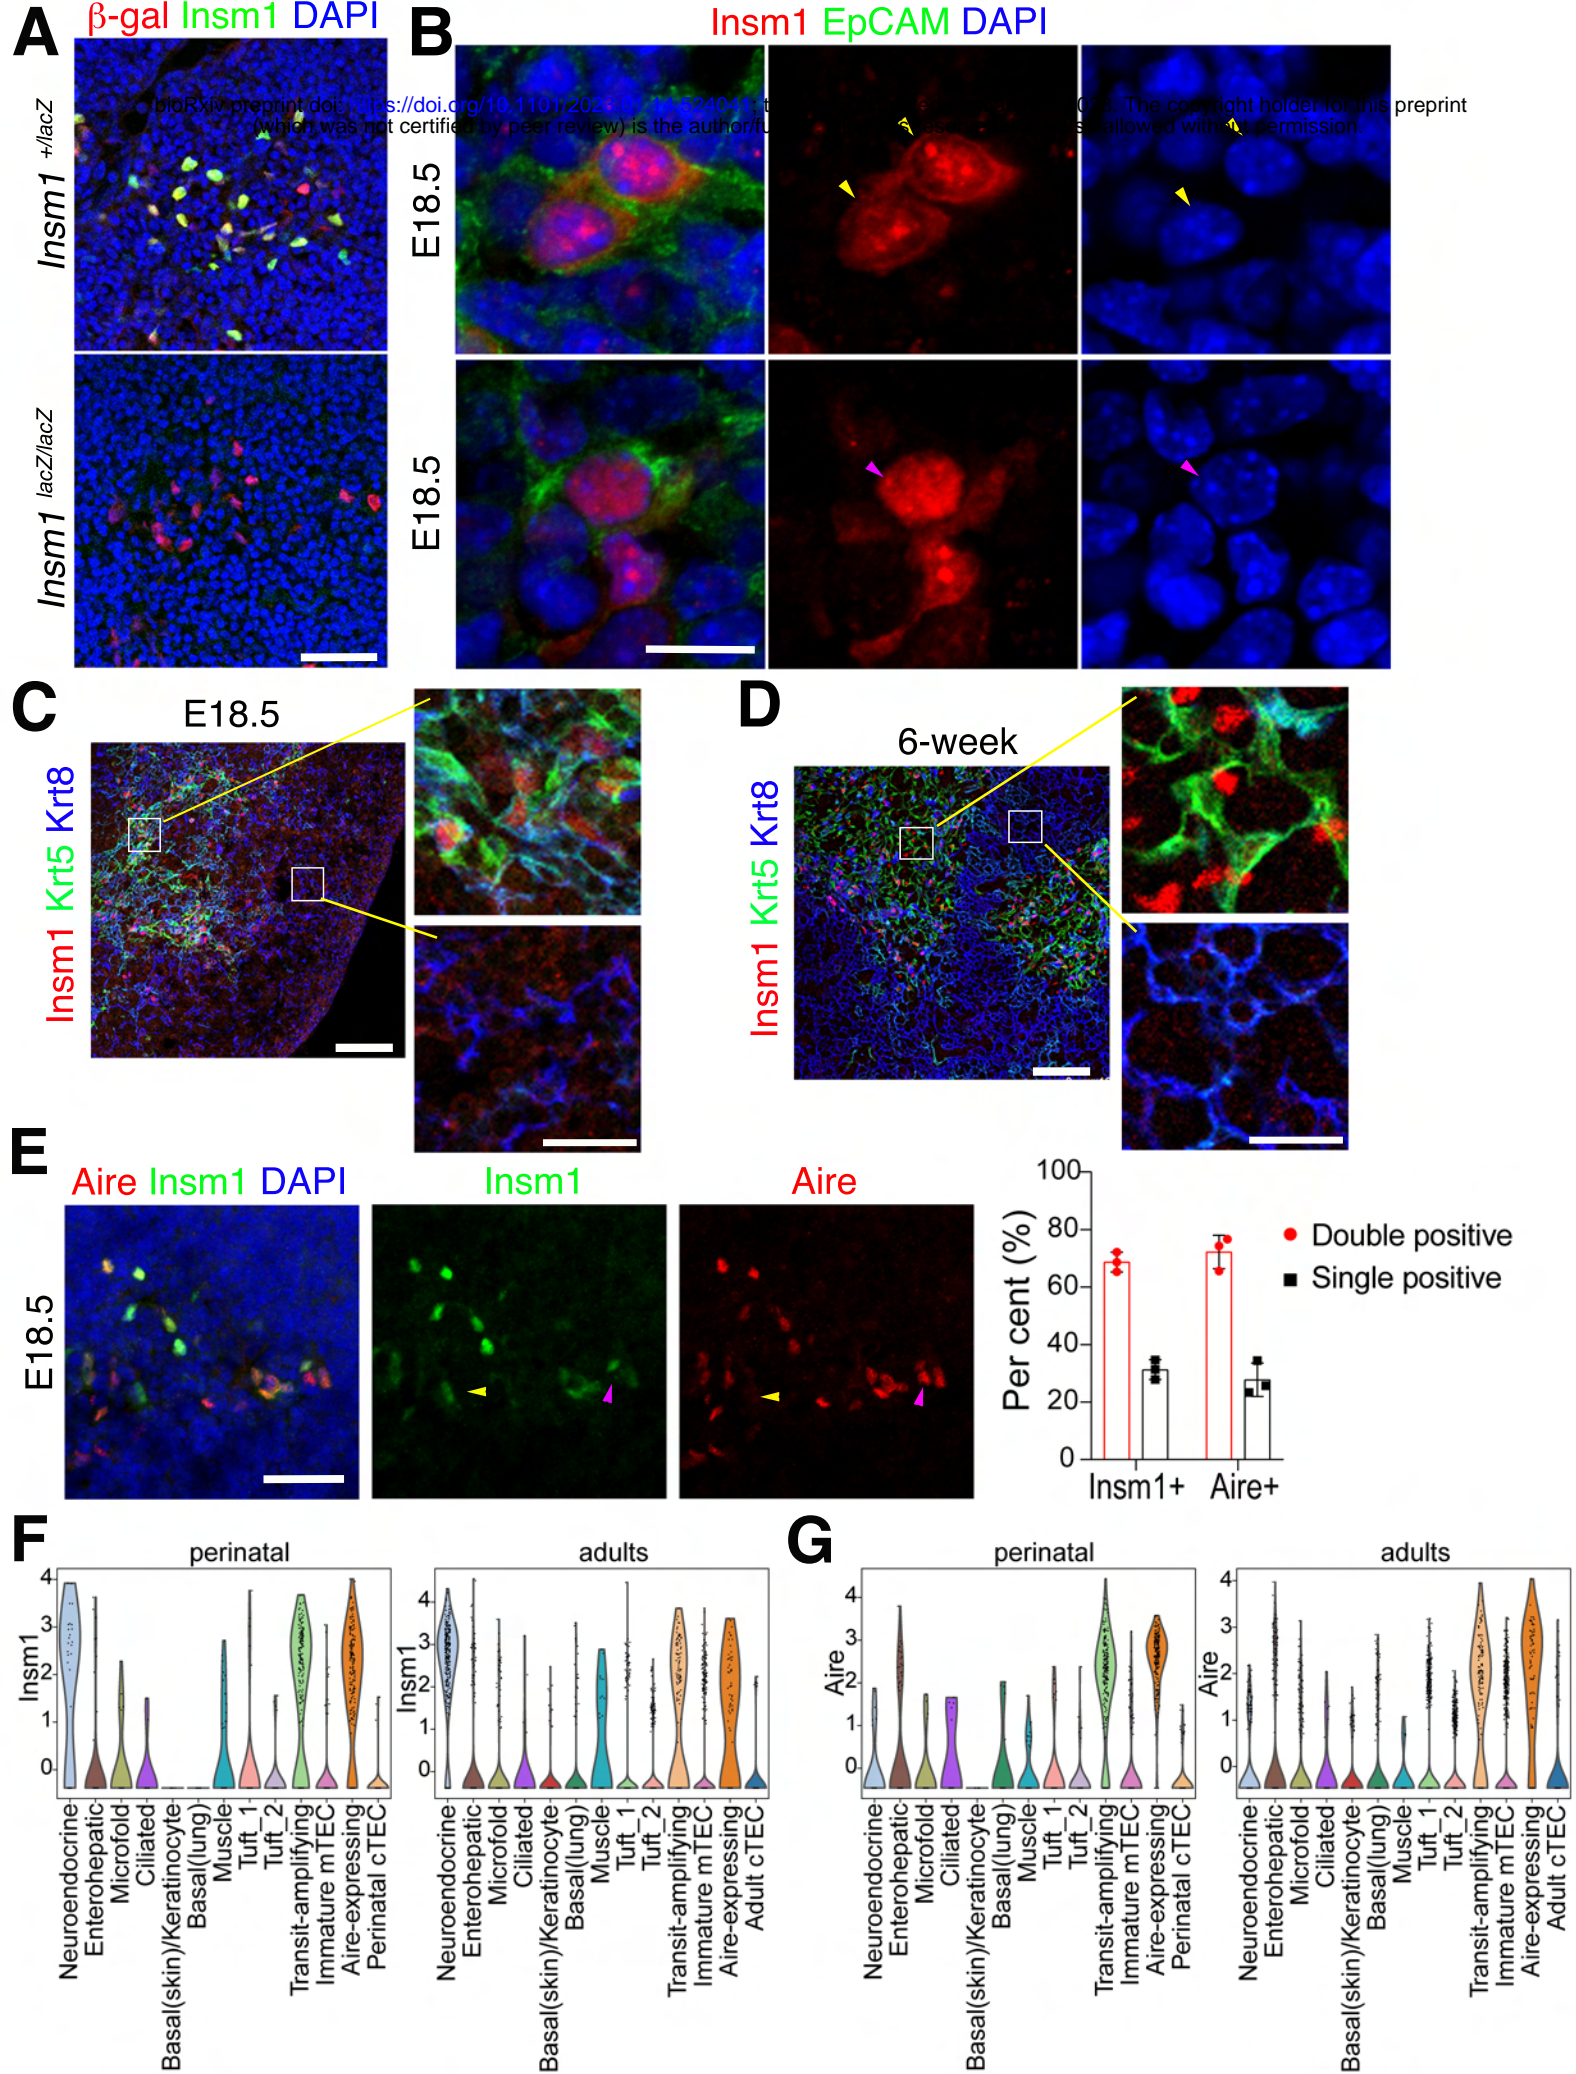

Fig. 1

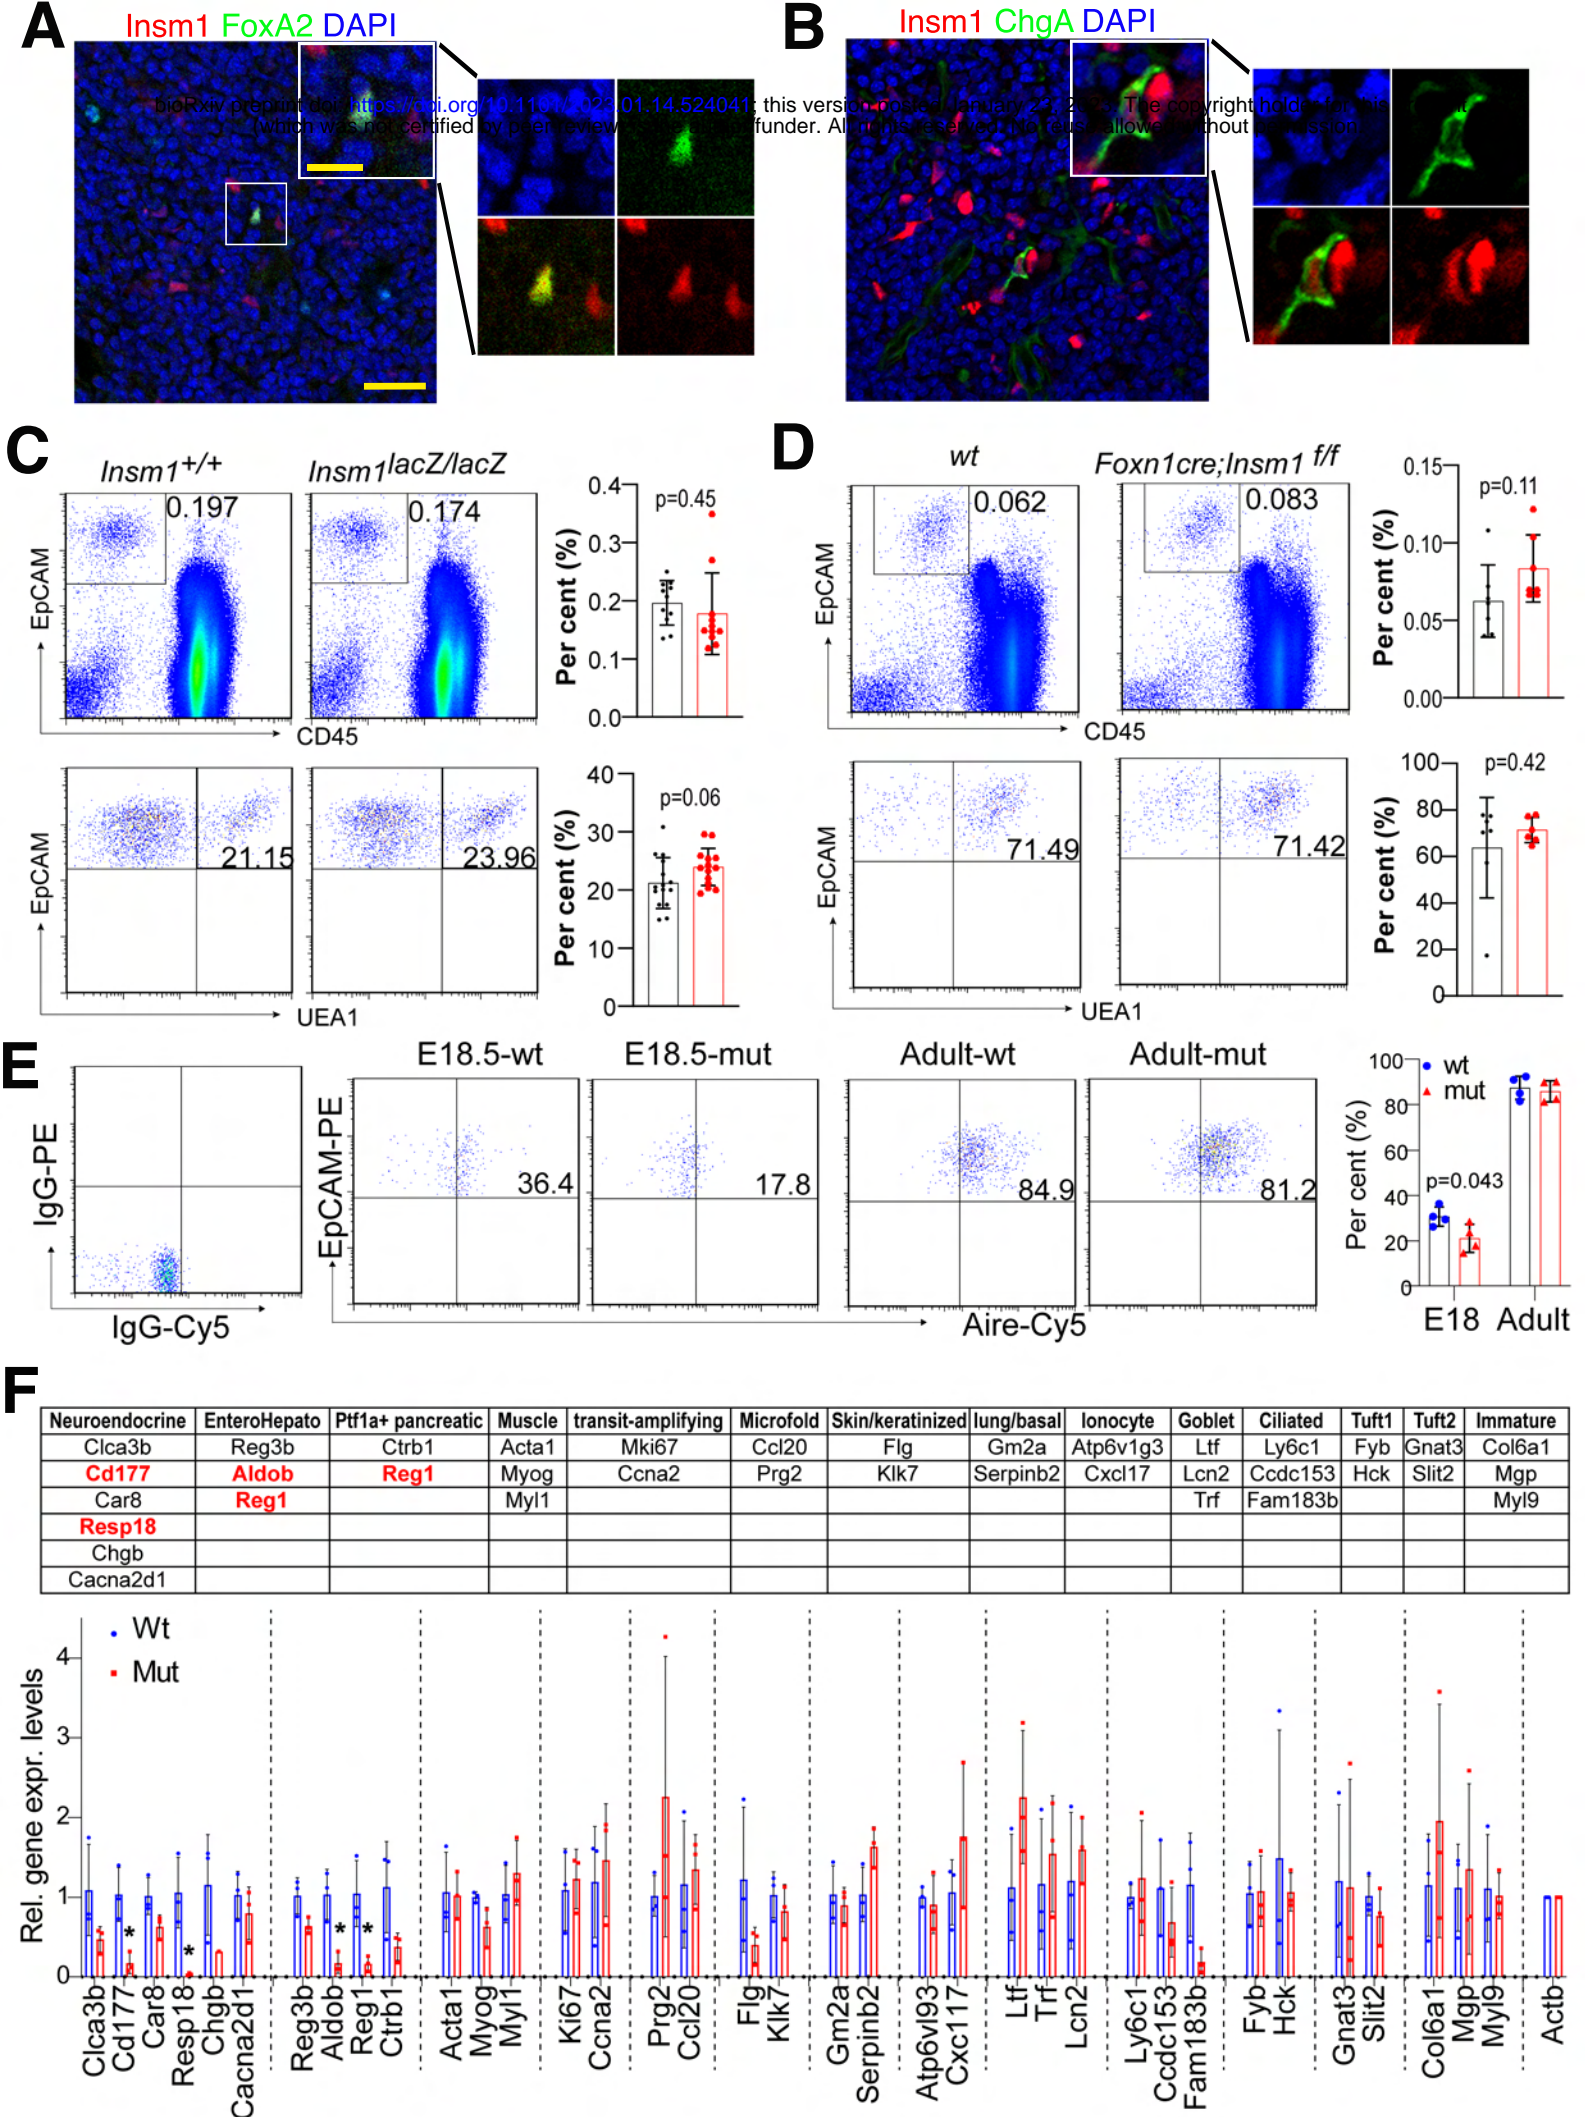

Fig. 2



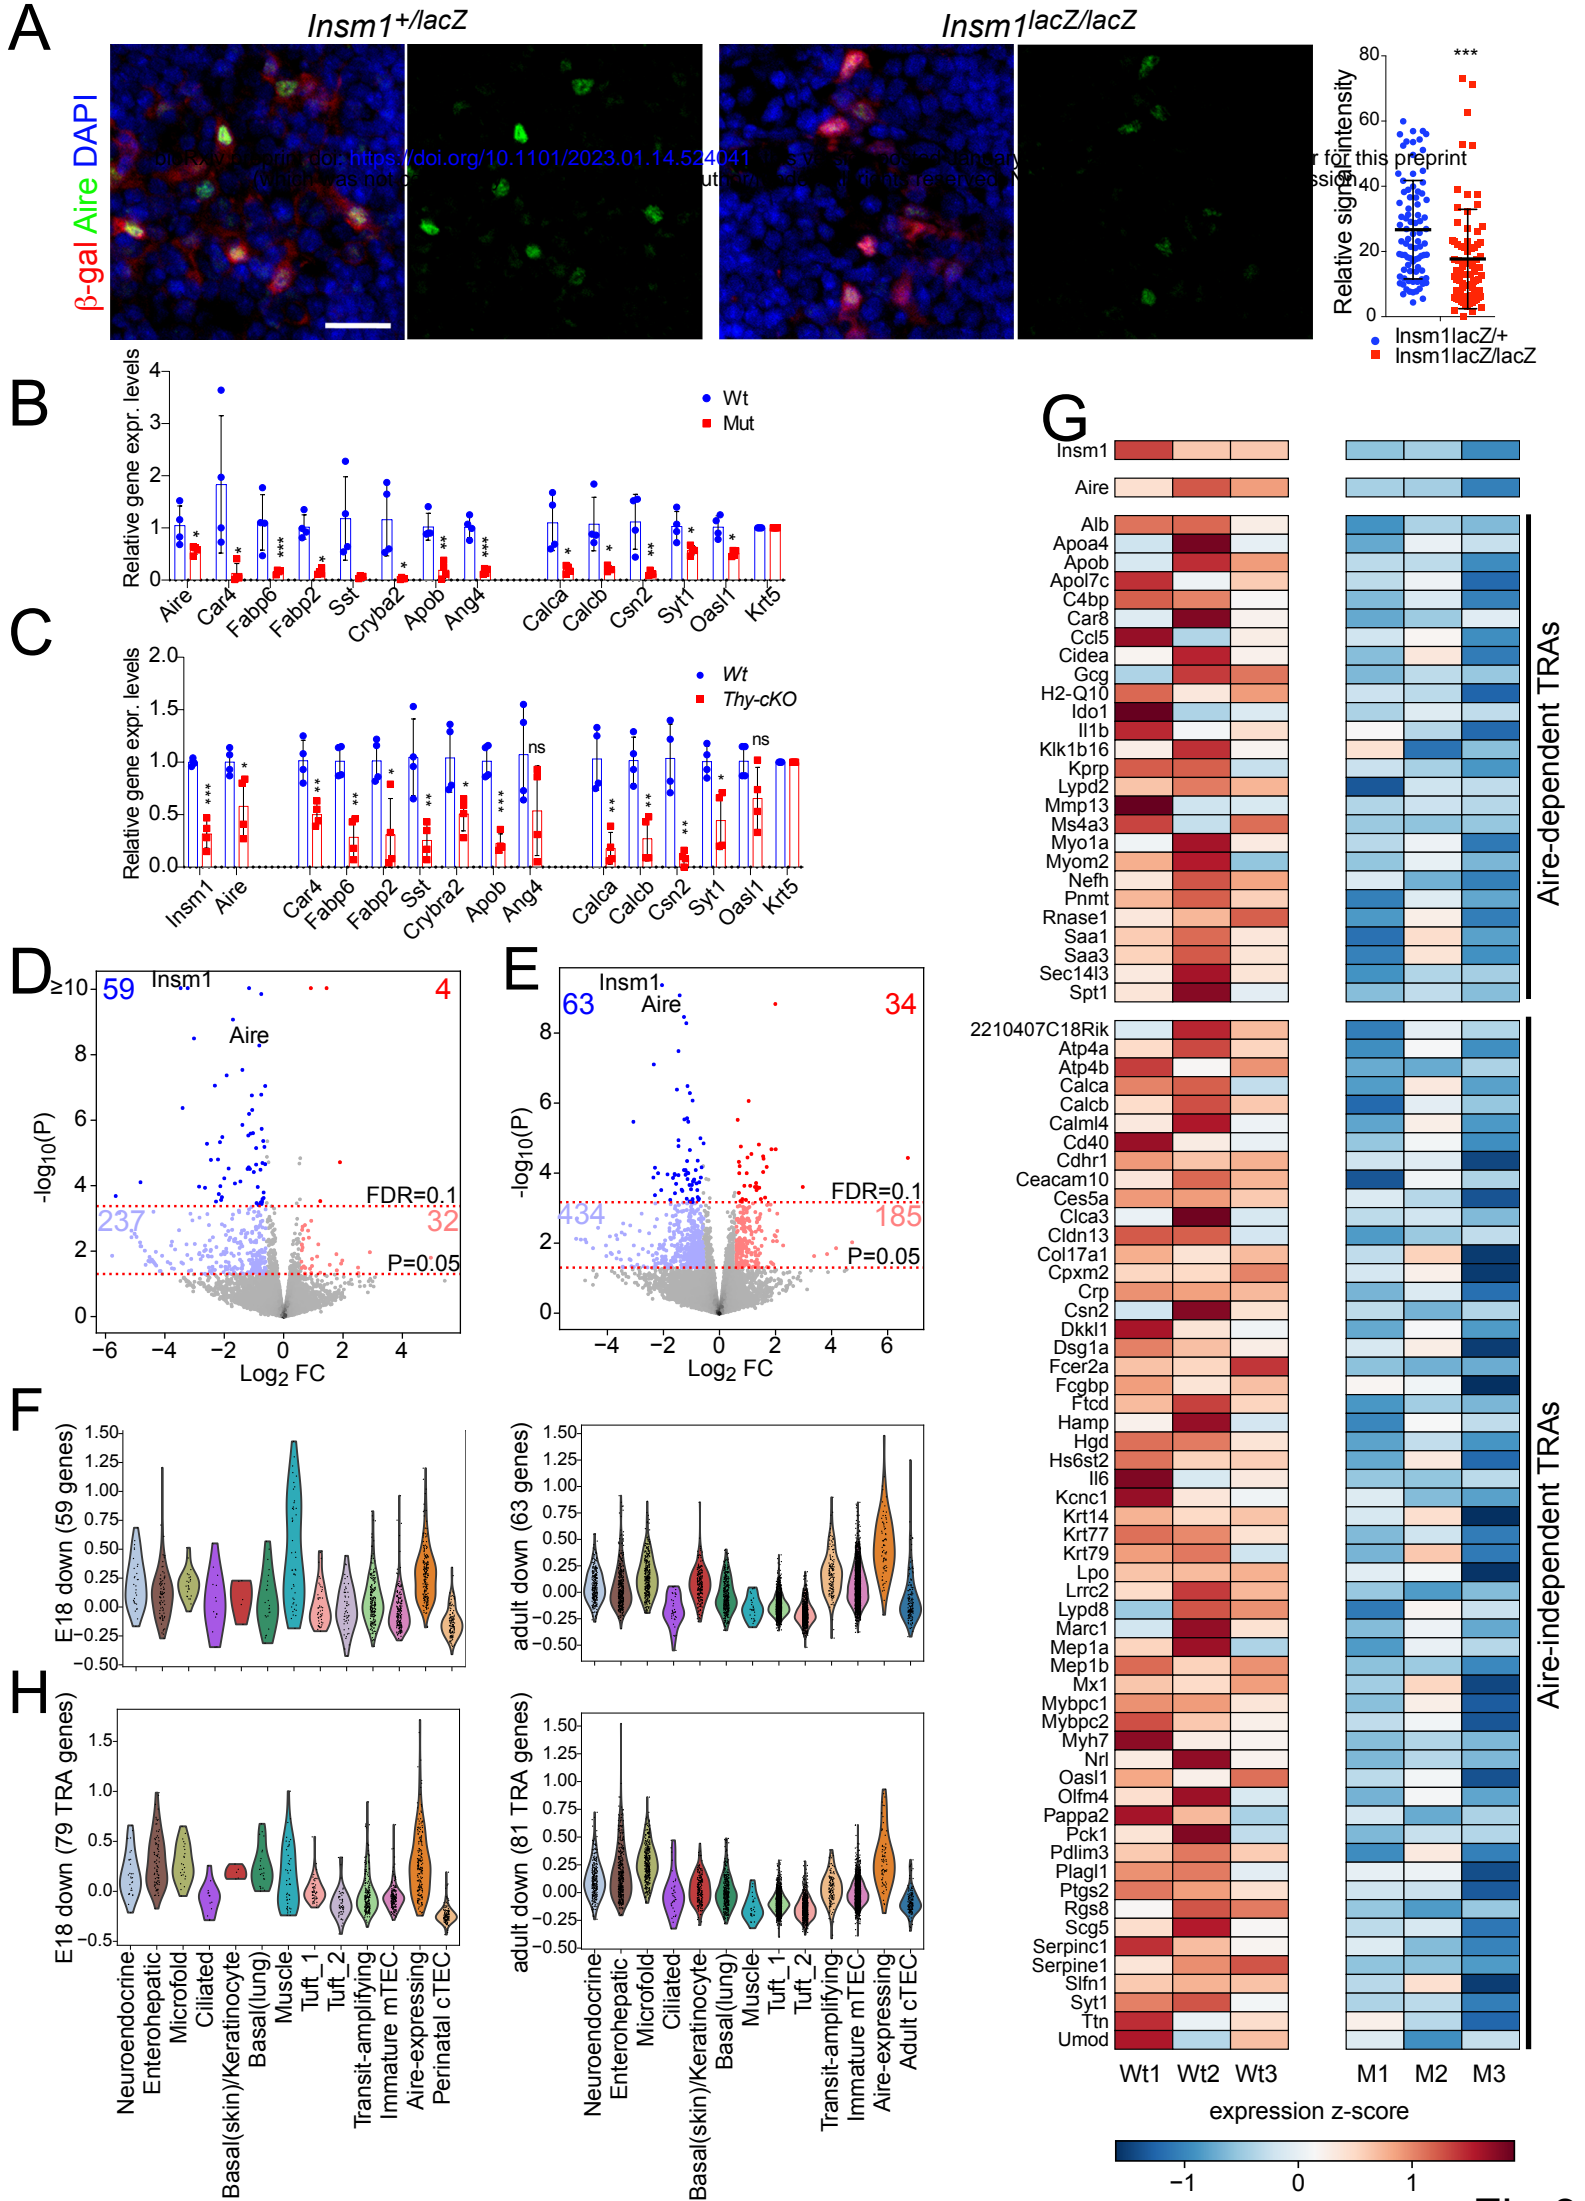

Fig 3

A

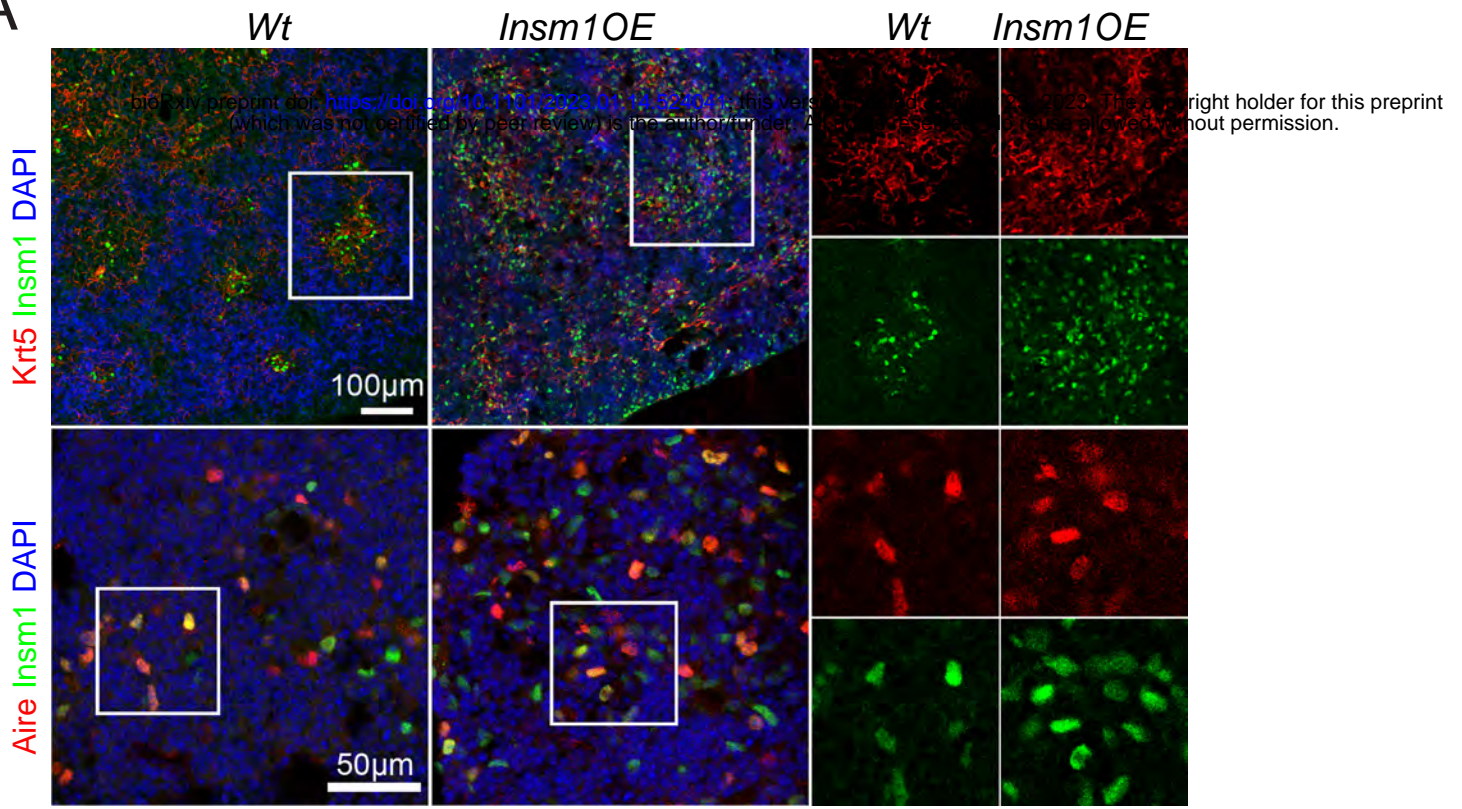

B

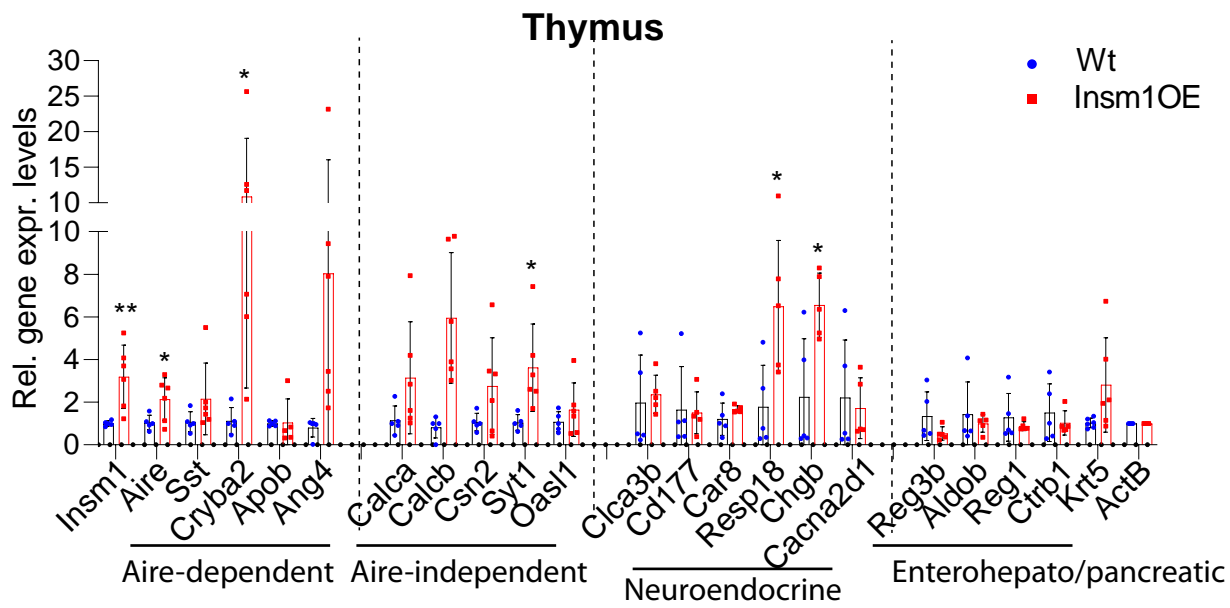

C

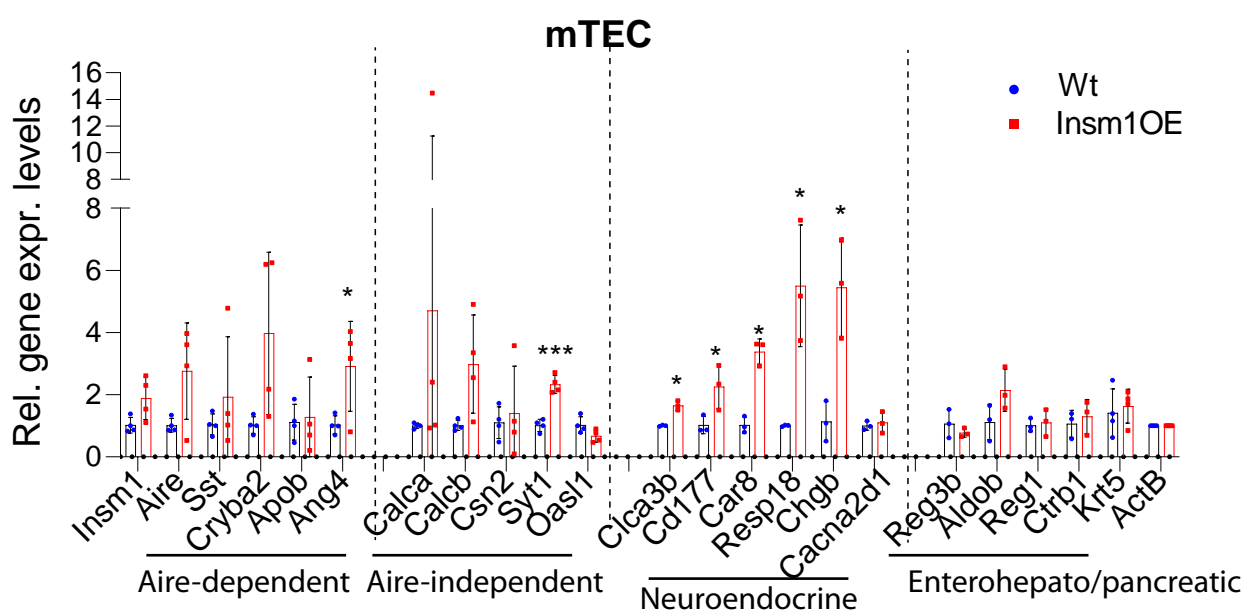

Fig. 5

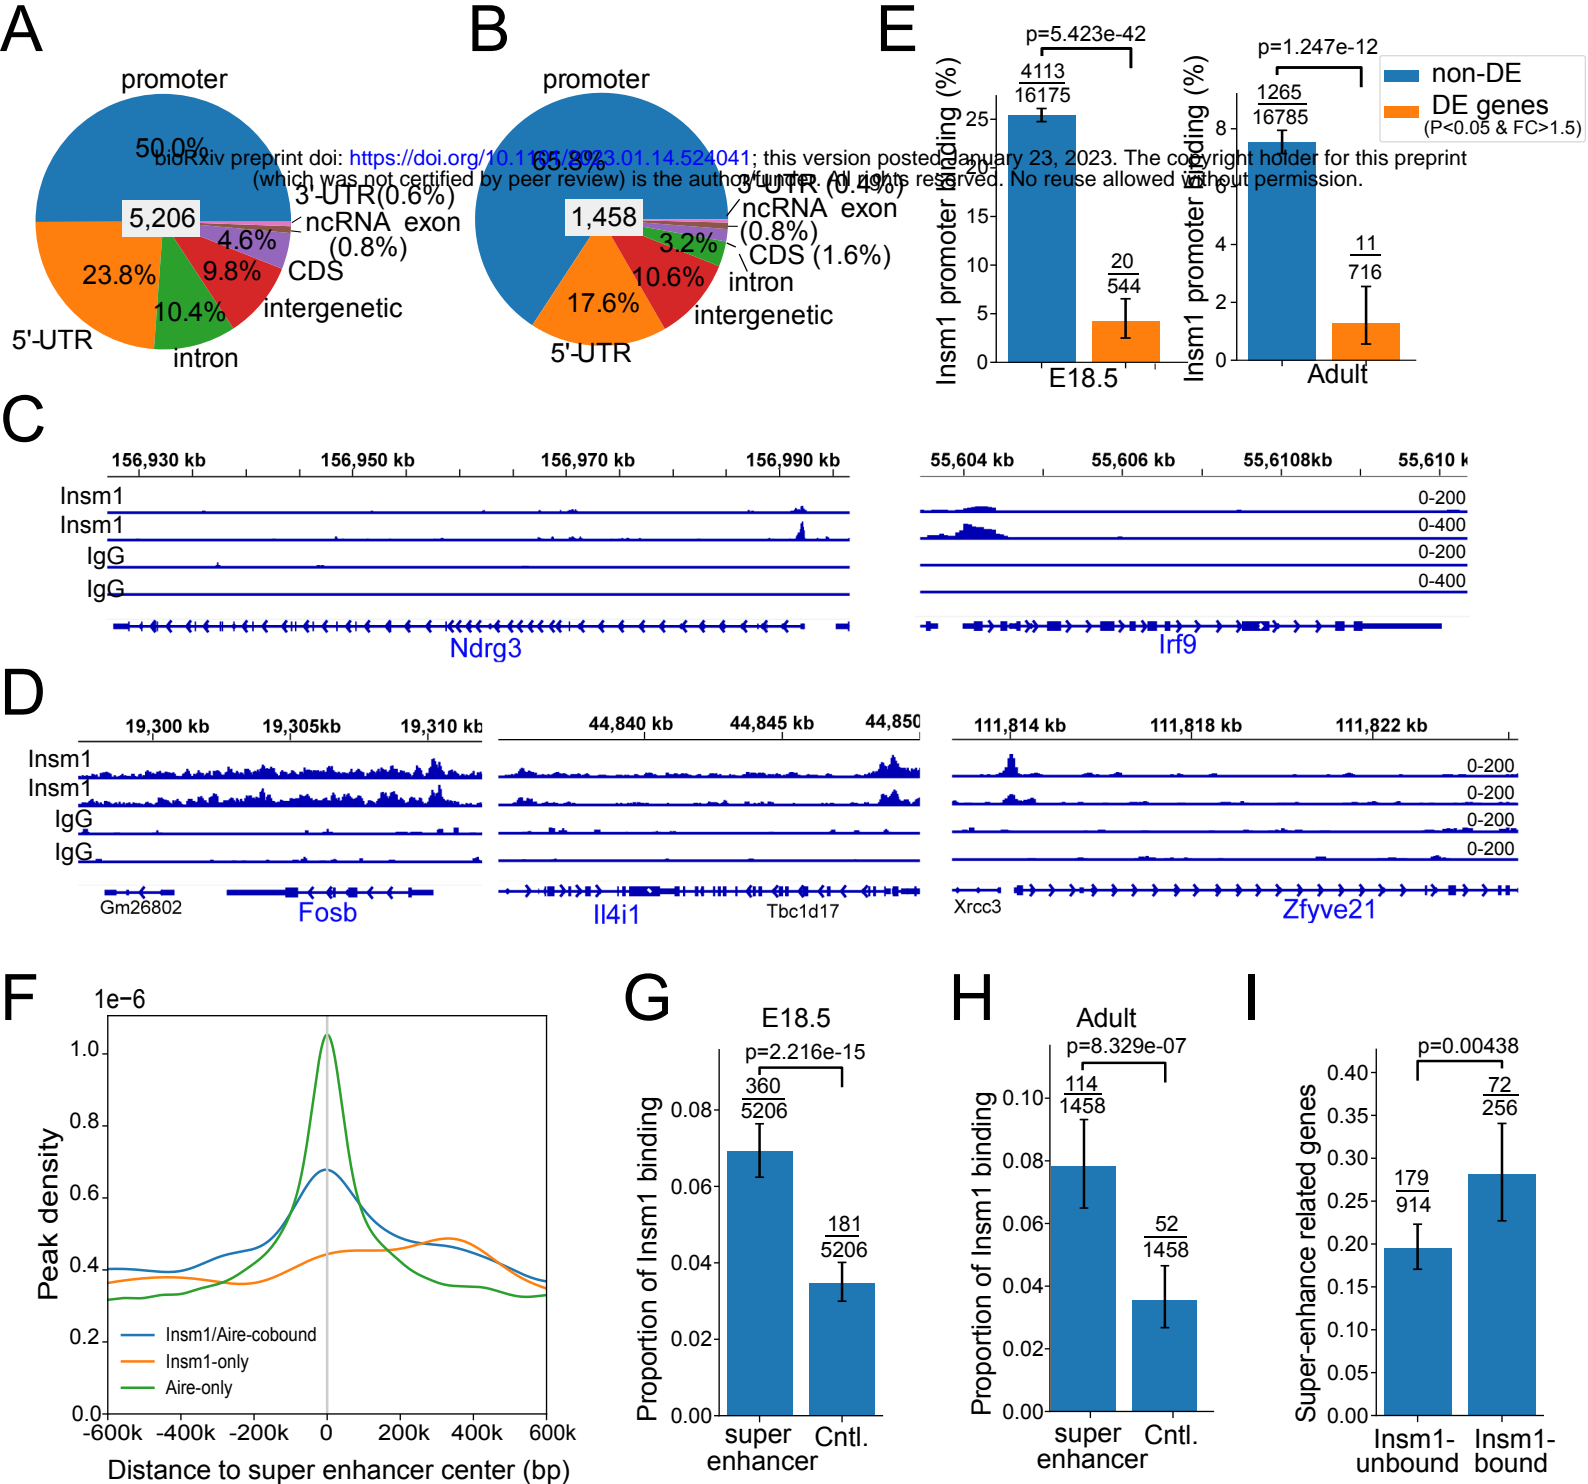

Fig. 5

# A E18.5 thymic organ culture

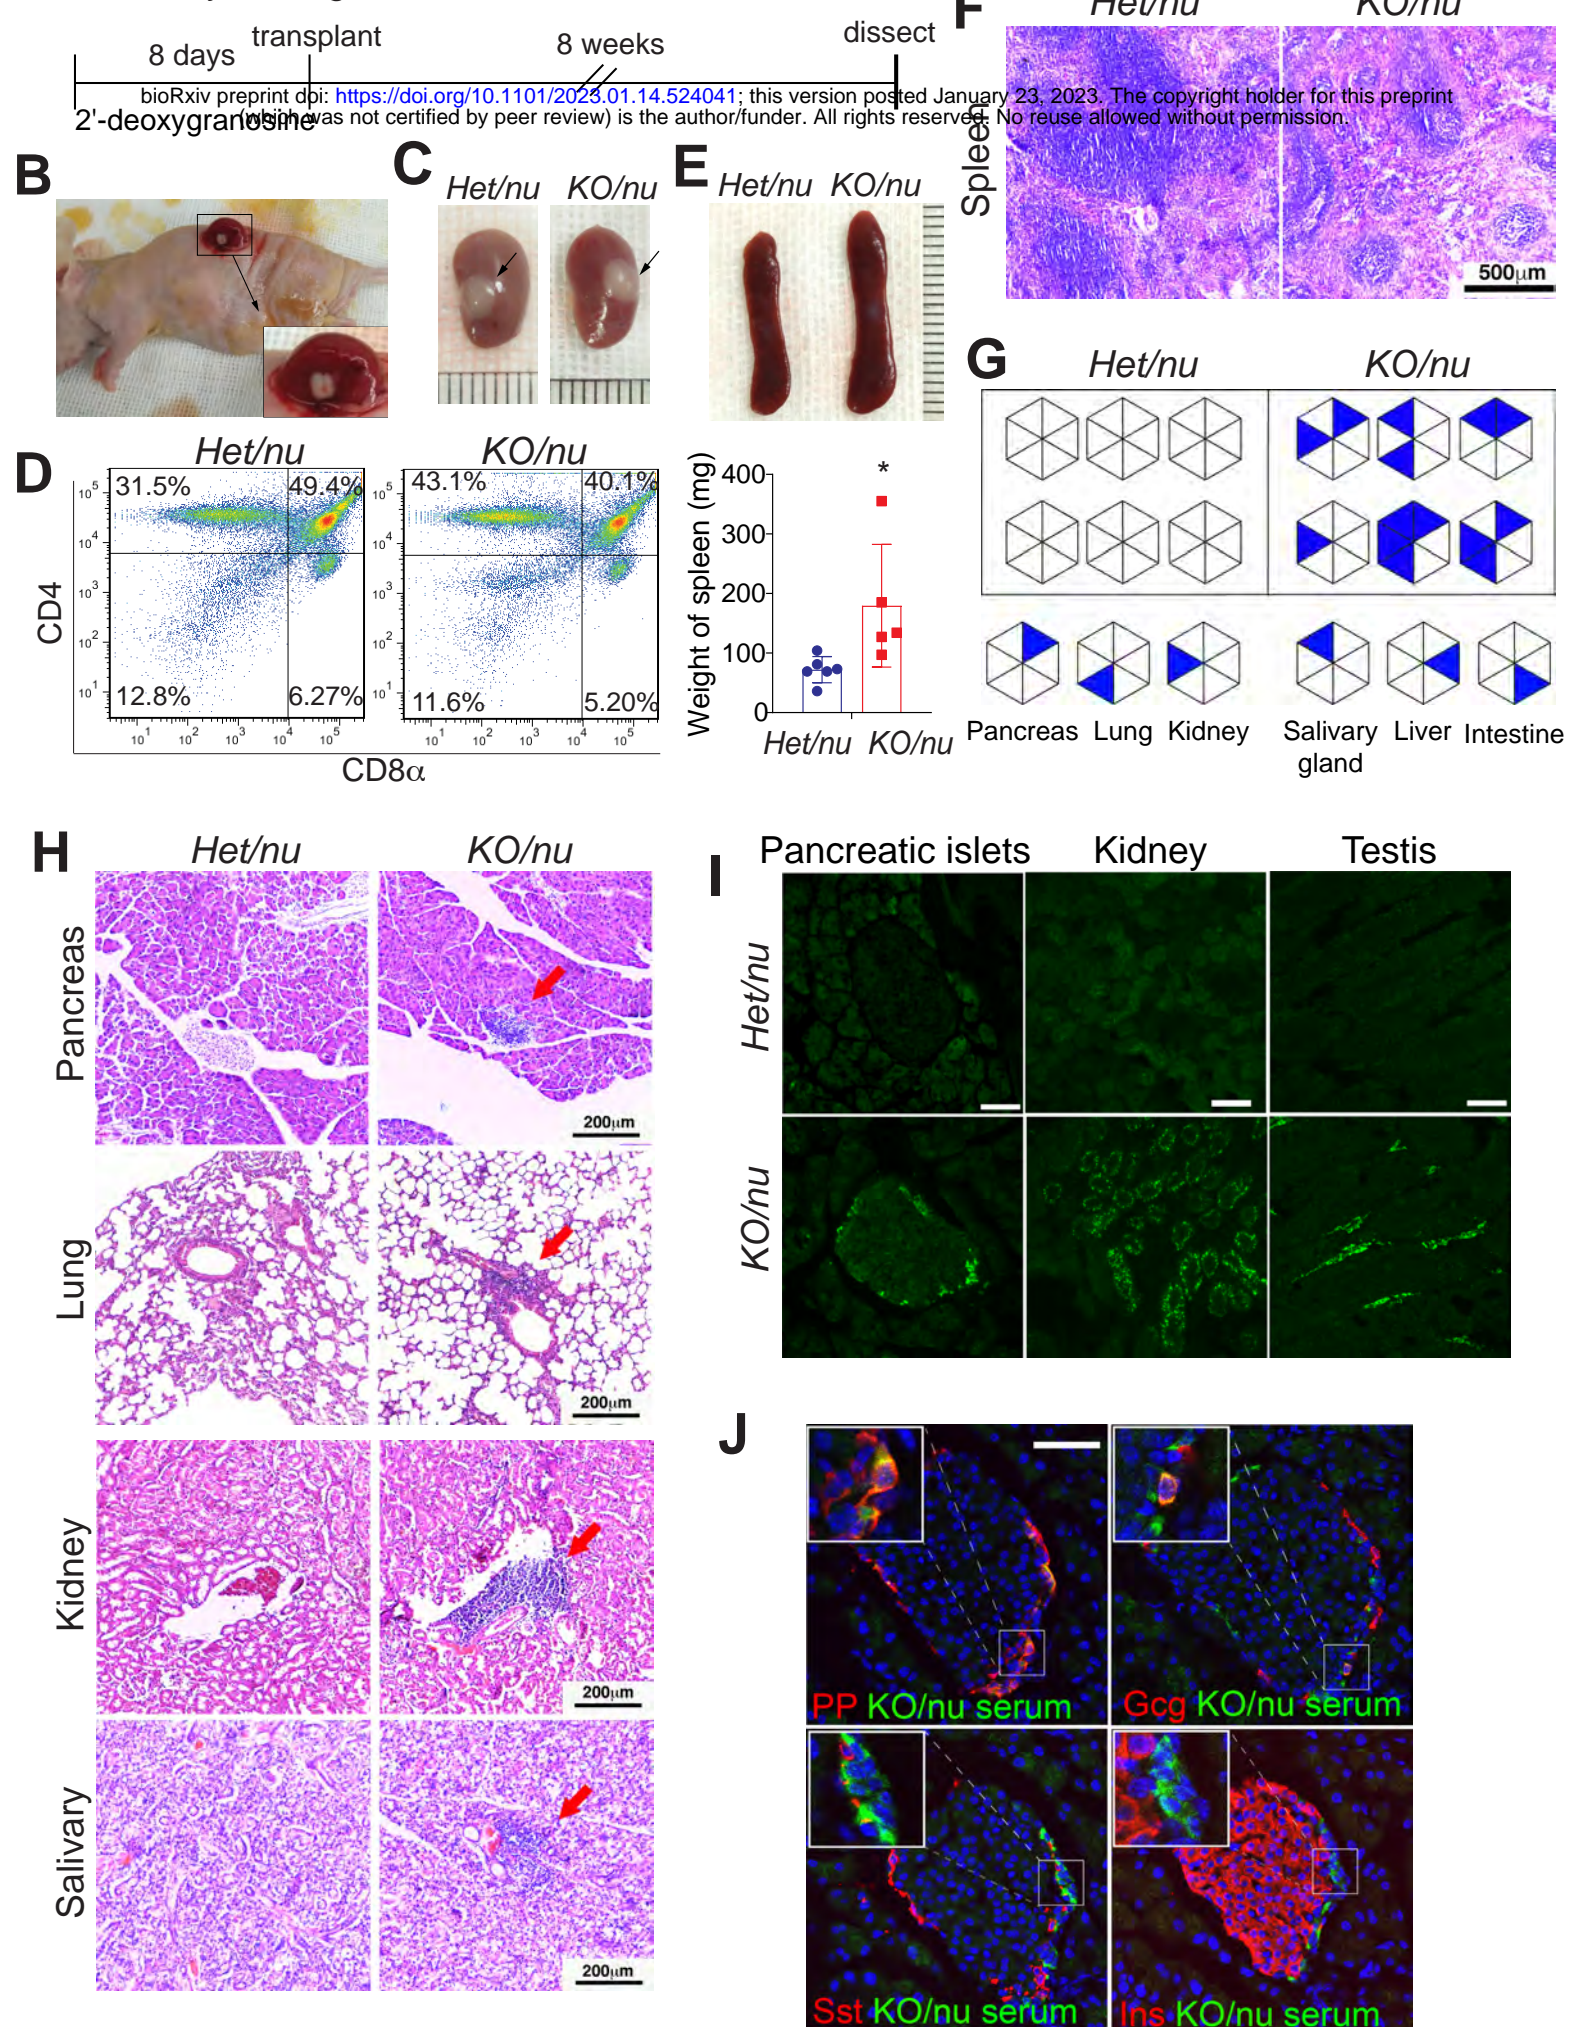

Fig. 6

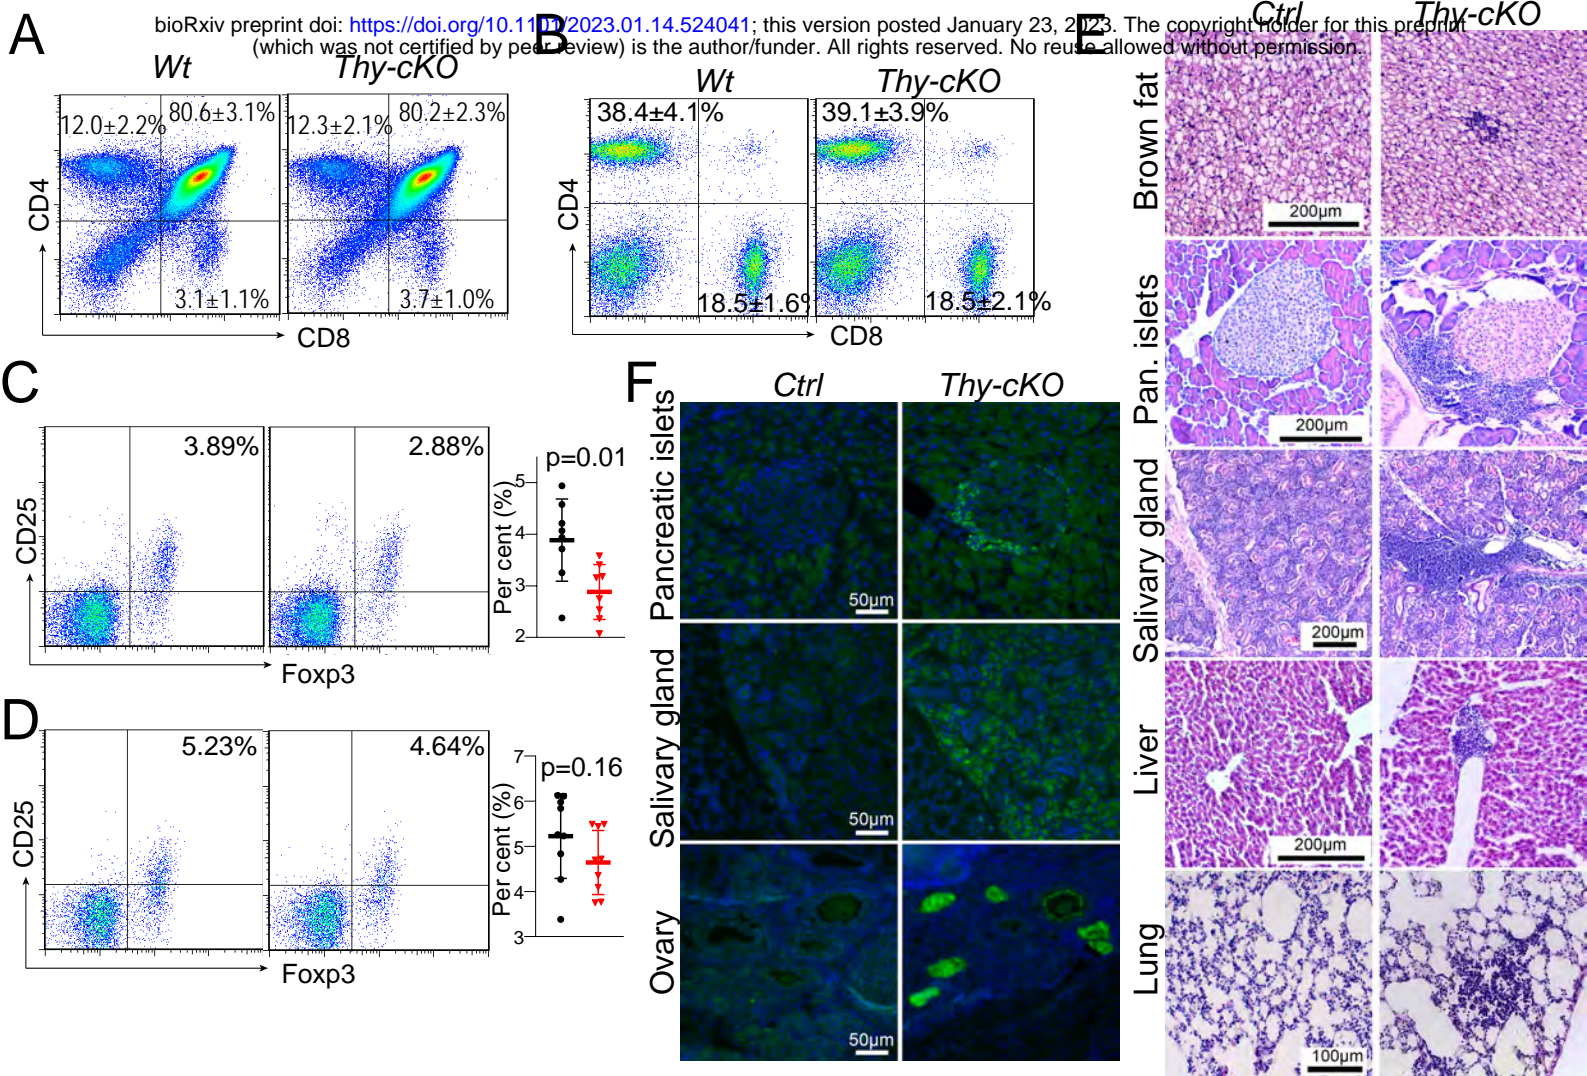

Fig. 7
